# Supplementary material
Source: PubMed Central journal article supplement (PMC4596915)
Supplement: mmc1.pdf [file mmc1.pdf]

The American Journal of Human Genetics

Supplemental Data

**Biallelic Mutations in Nuclear Pore Complex Subunit  
*NUP107* Cause Early-Childhood-Onset Steroid-Resistant  
Nephrotic Syndrome**

Noriko Miyake, Hiroyasu Tsukaguchi, Eriko Koshimizu, Akemi Shono, Satoko Matsunaga, Masaaki Shiina, Yasuhiro Mimura, Shintaro Imamura, Tomonori Hirose, Koji Okudela, Kandai Nozu, Yuko Akioka, Motoshi Hattori, Norishige Yoshikawa, Akiko Kitamura, Hae Il Cheong, Shoji Kagami, Michiaki Yamashita, Atsushi Fujita, Satoko Miyatake, Yoshinori Tsurusaki, Mitsuko Nakashima, Hiroto Saito, Kenichi Ohashi, Naoko Imamoto, Akihide Ryo, Kazuhiro Ogata, Kazumoto Iijima, and Naomichi Matsumoto

## **Supplemental Note: Case Reports**

These unrelated families are all of Asian origin (four Japanese families, SRNS-1, SRNS-2, SRNS-TK1 and SRNS-TWH1; and one Korean family, SRNS-12) based on their clinical records and interviews (Fig. 1A). Previously, three families, SRNS-1, SRNS-2, SRNS-12, had been reported.<sup>1</sup> The affected individuals show only a kidney-specific phenotype with no abnormal manifestations of other organs, including neurological and sensory features.

### **SRNS-1**

In this family, the older sister (II-2) showed proteinuria at 3 years of age and was treated with steroids. A renal biopsy showed focal glomerulosclerosis of a not-otherwise-specific (NOS) subtype. She died from a varicella zoster virus infection at 3 years of age, before reaching ESRD. The youngest brother (II-4) first developed proteinuria at 3 years, similarly to his affected sister. He received steroid therapy combined with immunosuppressants (cyclosporine [CyA] and cyclophosphamide [CPA]). However, his renal function progressively worsened and he became dialysis-dependent at 9 years of age. He received a renal transplant from his father at 11 years of age and no recurrence of SRNS to date. Parents (I-1, I-2) and two siblings (II-1, II-3) have shown no renal symptoms.

### **SRNS-2**

The extended SRNS family was first recognized by early-onset nephrotic syndrome in the older sister (II-1), who was found to have proteinuria at 2 years of age. She was treated with steroids combined with CyA.

However, she was resistant to drug therapy and progressed to ESRD by age 10 years. The histology of her first renal biopsy at 2 years old showed minimal change but her second biopsy at 4 years revealed FSGS (NOS subtype). At age 10, she underwent a renal transplant of a kidney donated from her father. Subsequently, her two younger identical-twin brothers (II-3 and II-4) displayed early onset SRNS, with a clinical course quite similar that of the older sister (II-1). One brother (II-3) first manifested SRNS at age 2 years. He reached ESRD at 7 years, and received a renal transplant—from his mother at that age. The other brother (II-4) took a similar clinical course to his affected siblings, developing SRNS at 2 years and progressing to ESRD at 7 years. He received a cadaveric renal transplantation from his paternal grandmother at 9 years. In all three affected individuals, no post-transplant recurrence of SRNS has been observed.

### **SRNS-TK1**

The first child (II-1) developed nephrotic syndrome at age of 2 years. He was resistant to the standard steroid regimen with CyA and progressed to ESRS at age of 4 years. His renal biopsy at 2 years revealed FSGS. His parents (I-1, I-2) and one brother (II-2) were healthy and had no renal abnormalities. He received a renal transplant at age 7 years from his father, and did not show any recurrence of SRNS.

### **SRNS-TWH1**

The elder sister (II-1) first manifested nephrotic syndrome at 3 years of age. Her renal biopsy revealed a collapsing subtype of FSGS. Despite combination therapy with steroids, angiotensin II receptor blocker (ARB), and plasmapheresis, she rapidly progressed to ESRD at age 4 years. She received a transplanted kidney from her father (I-1). Her younger brother (II-2) exhibited early-onset SRNS quite similar to his

affected sister: He developed a nephrotic condition by age 3 years and received combined immunosuppressive therapy (steroid, CyA and ARB). However, he was resistant to the therapy and had developed ESRD by age 5 years. His renal pathology at age 3 years was a collapsing subtype of FSGS. He is currently treated by peritoneal dialysis, waiting for renal transplantation.

## **SRNS-12**

This SRNS family has been previously reported.<sup>1</sup> The third daughter (II-3; proband) first manifested nephrotic syndrome at the age of 11 years. Her renal biopsy revealed NOS subtype of FSGS. Despite combined therapy with steroids and ARB, she rapidly progressed to ESRD by age 12 years and thereafter started peritoneal dialysis. She received a kidney transplant from her father at age 14 years. She has not developed NS in the 10 years since her kidney transplantation.

The second daughter (II-2) developed proteinuria at age 10 years. However, her clinical course was milder than that of her younger sister, the third daughter (II-3) who reached ESRD only 1 year after the onset of SRNS. She has never produced nephrotic proteinuria, nor received immunosuppressive therapy. Her subnephrotic-range proteinuria (1.4–4.0 g per gram creatinine) has persisted over the last 10 years. Renal biopsy has not yet been performed. Her renal function has been preserved compared to her younger sister (II-3), but has gradually declined from eGFR 85.5 ml/min (at age 32 years) to 62.2 ml/min (at her current age of 34 years) under administration of ARB alone (losartan 50 mg/day). The parents (I-1, I-2) and eldest daughter (II-1) have not shown any renal symptoms.

**Figure S1**

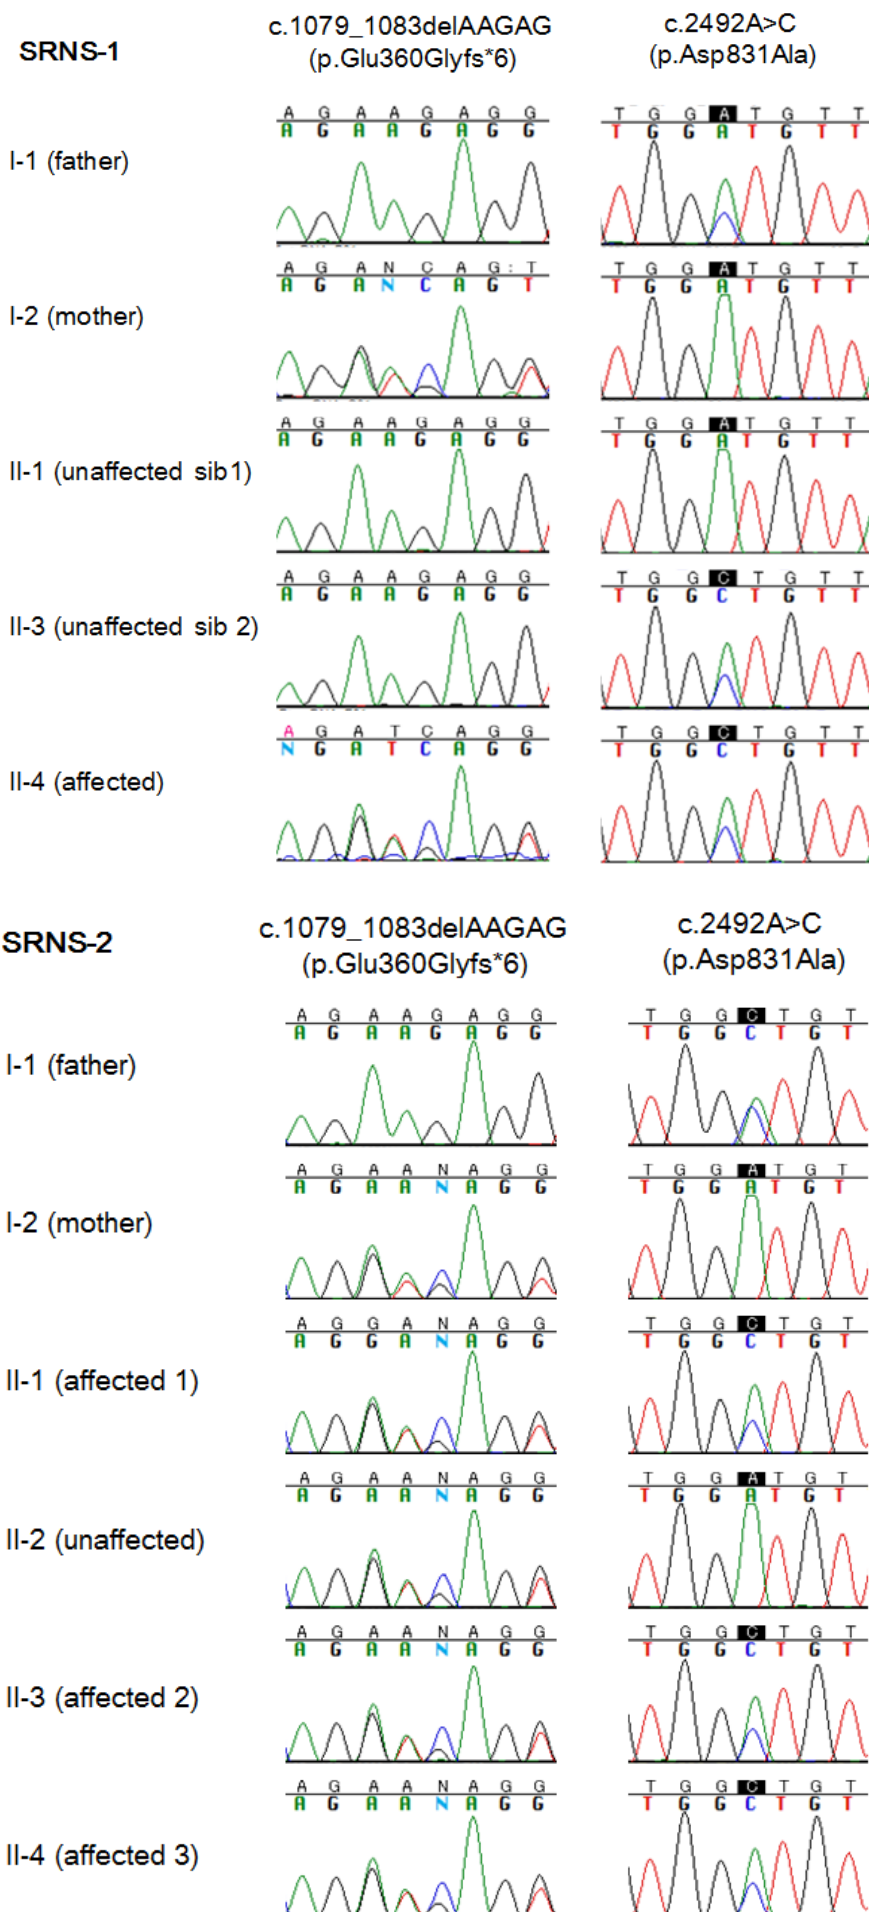

**SRNS-TK1**

c.969+1G>A

c.2492A>C  
(p.Asp831Ala)

I-1 (father)

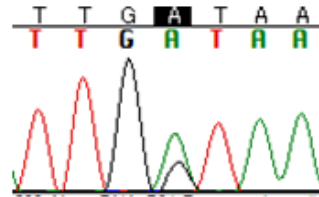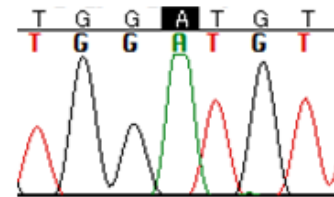

I-2 (mother)

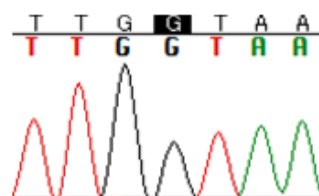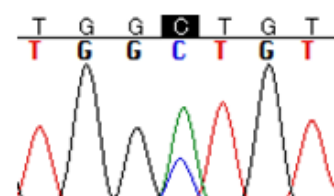

II-1 (affected)

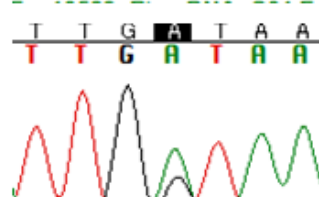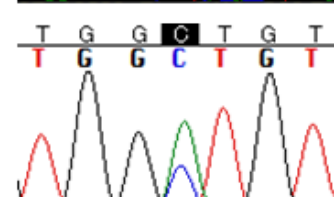

II-2 (unaffected sib)

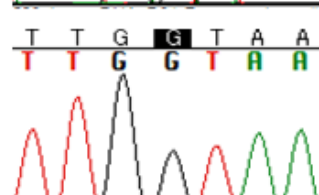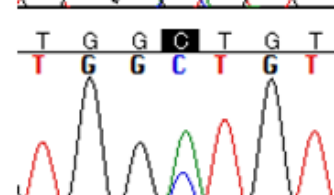

**SRNS-TWH1**

c.1079\_1083delAAGAG  
(p.Glu360Glyfs\*6)

c.2492A>C  
(p.Asp831Ala)

I-1 (father)

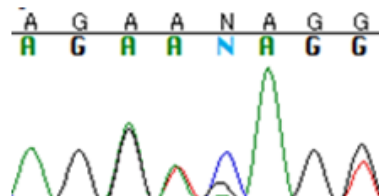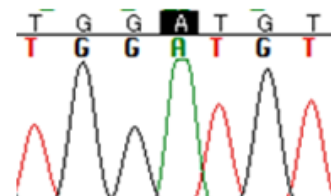

I-2 (mother)

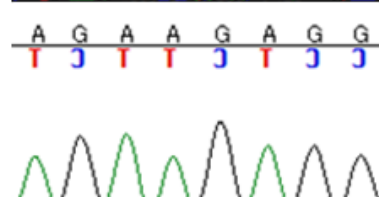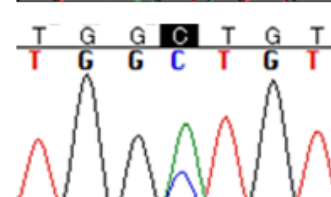

II-1 (affected 1)

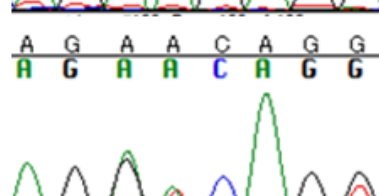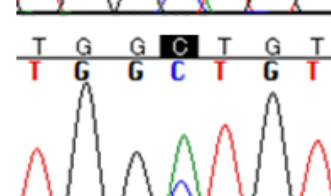

II-2 (affected 2)

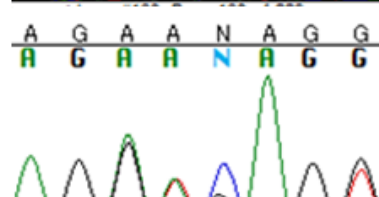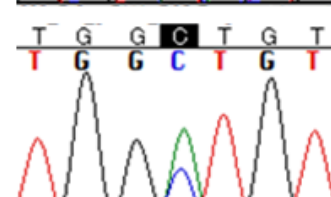

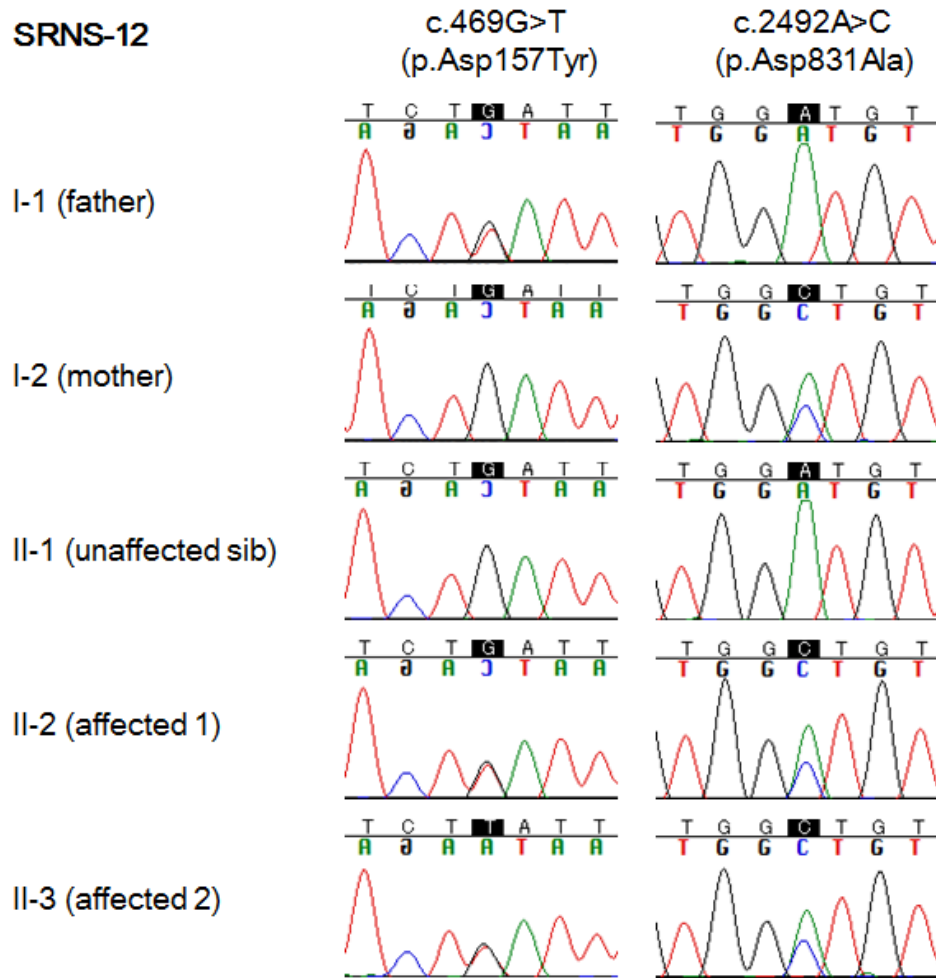

**Figure S1. Electropherograms of *NUPI07* Mutations Found in Families with Early-Onset Steroid-Resistant Nephrotic Syndrome**

Compound heterozygous mutations co-segregated completely with all the affected individuals in the five families.

Figure S2

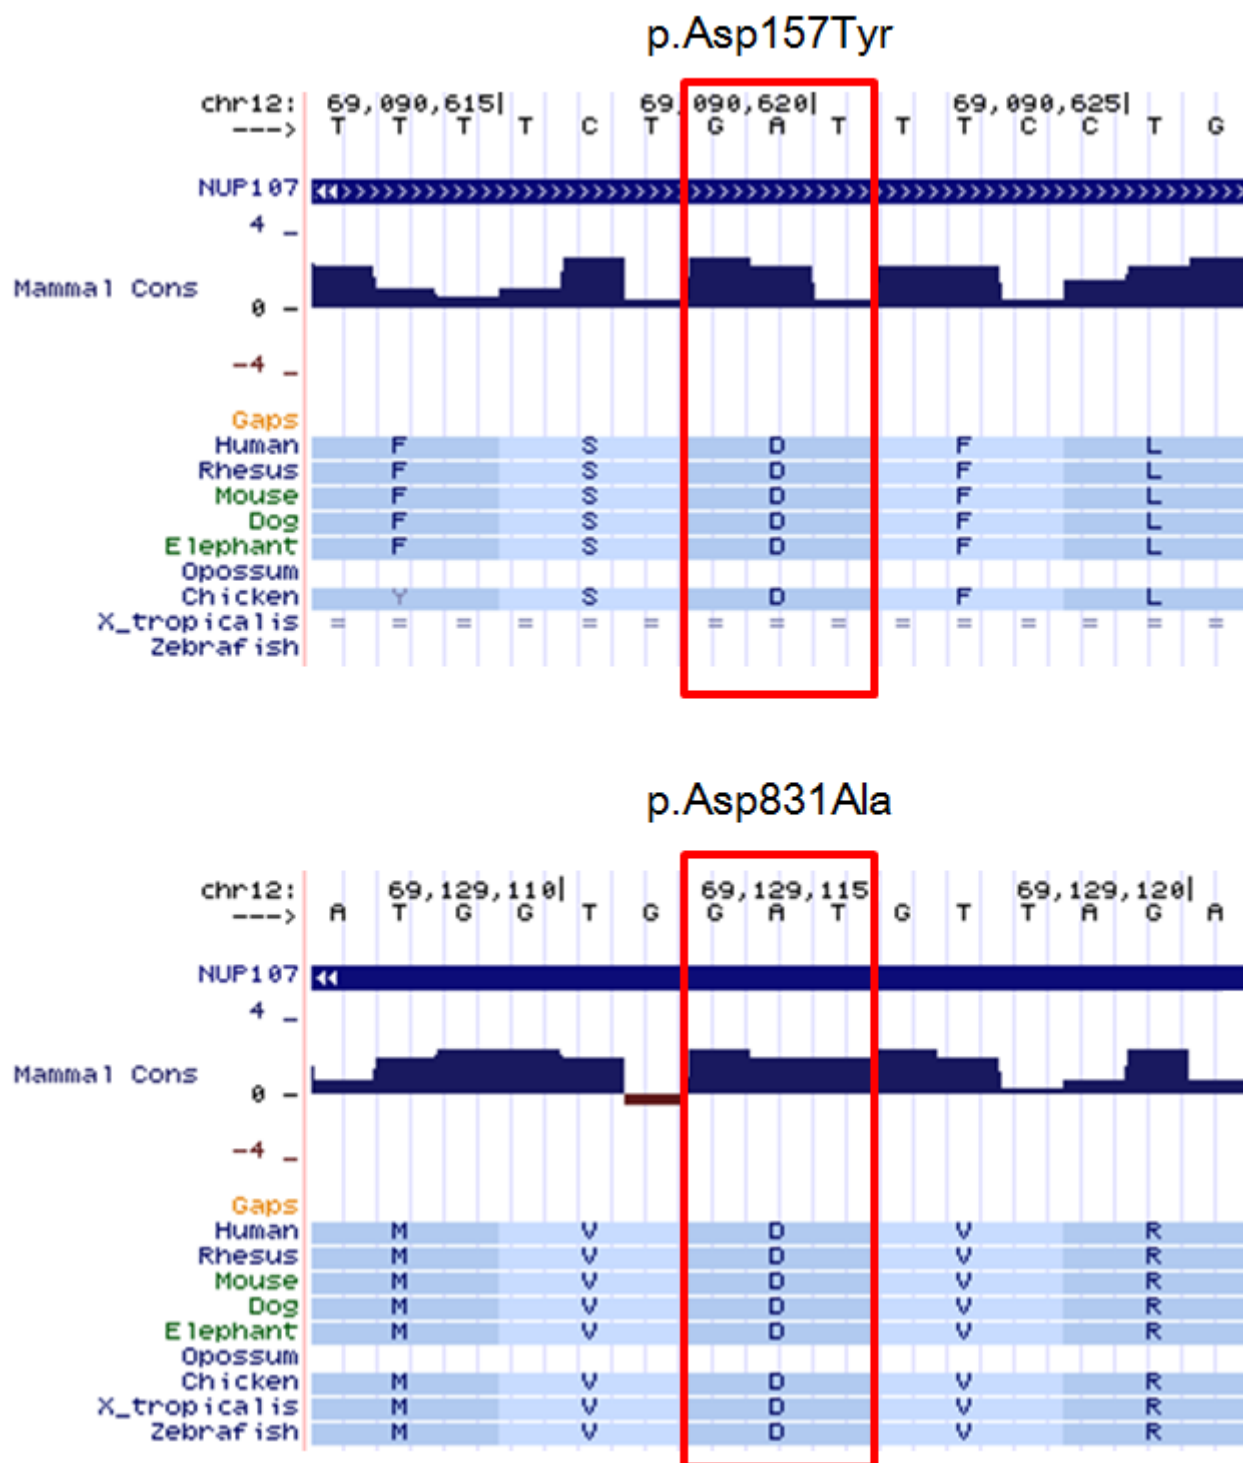

**Figure S2. Evolutionary Conservation of the Amino Acids Altered by Two Missense Mutations**

The amino acids altered in the affected individuals are evolutionally conserved from chickens to humans (p.Asp157) and from zebrafish to humans (p.Asp831).



**Figure S3**

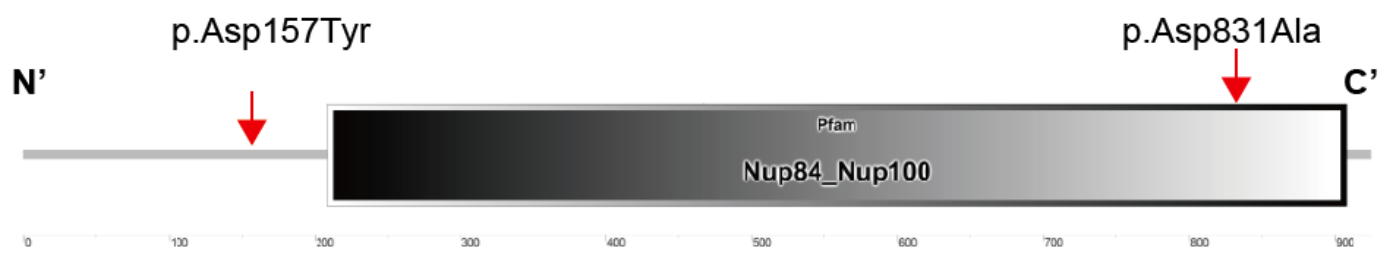

**Figure S3. Locations of the Two Missense Mutations in NUP107**

The region from 209 to 908 amino acids was defined as the Nup84\_Nup100 domain by the SMART program (<http://smart.embl-heidelberg.de/>) using NUP107 protein sequence (NP\_065134). p.Asp831Ala is localized within this domain.

**Figure S4**

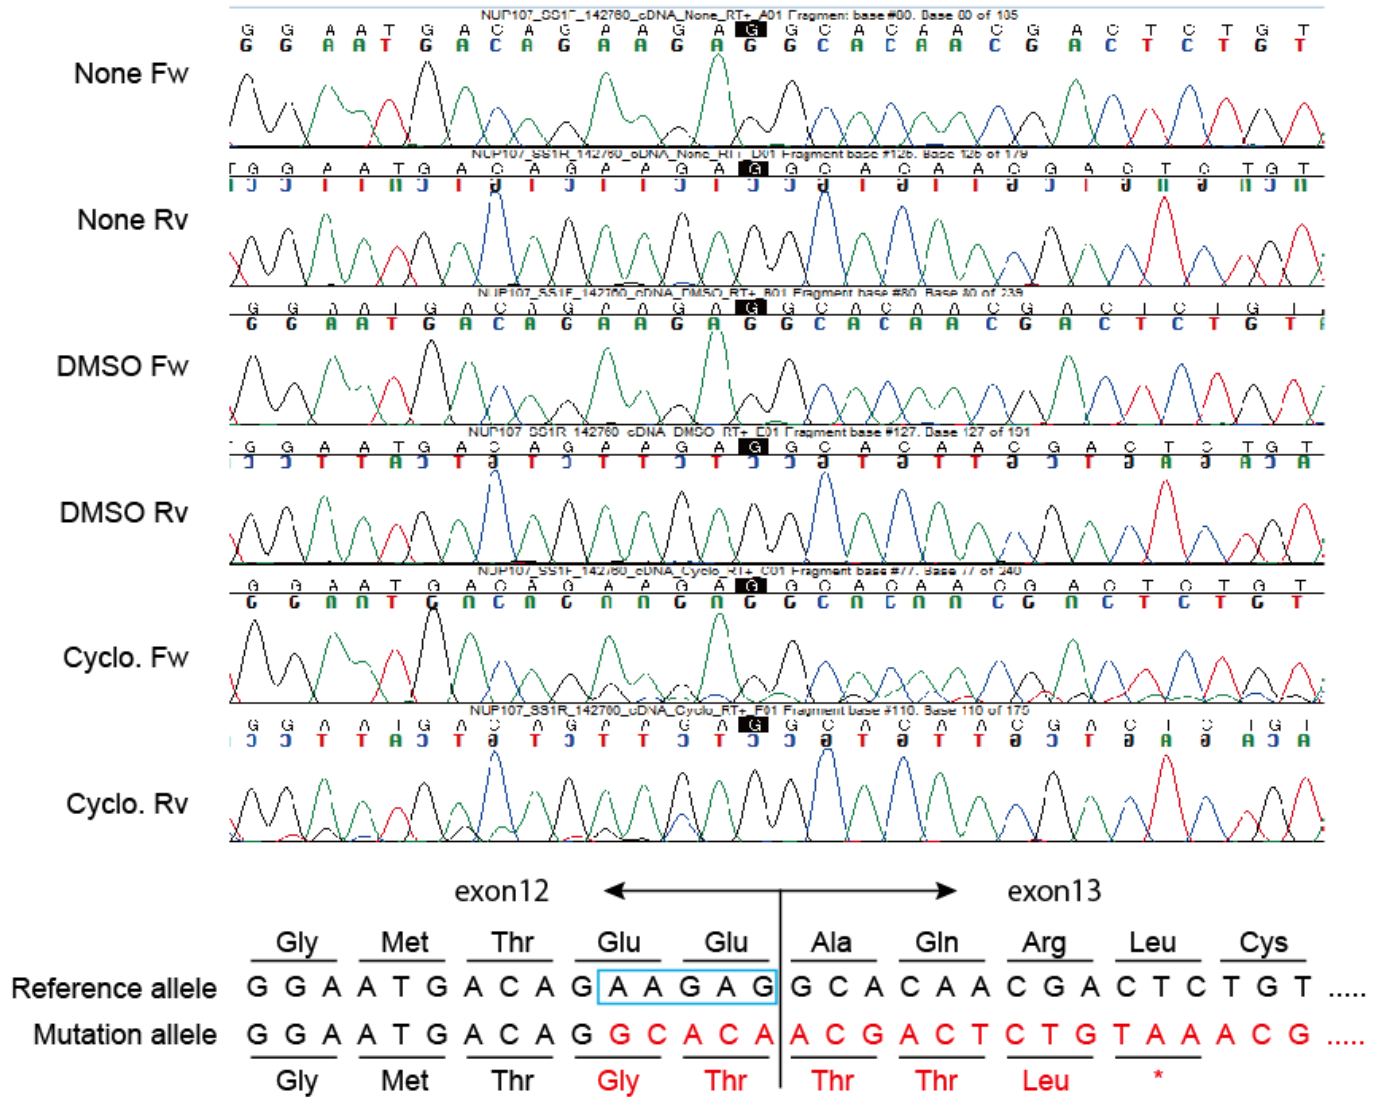

**Figure S4. Nonsense Mediated mRNA Decay by the 5-bp Deletion (c.1079\_1083delAAGAG)**

These chromatograms are from SRNS-TWH II-2. The 5-bp deletion (marked by the blue box) resulted in nonsense-mediated mRNA decay of the mutant allele as the cDNA sequence of the mutant allele can be seen only after treatment with cycloheximide.

Figure S5

[ Splice site prediction by Neural Network]

**Donor site predictions for WT :**

| Start | End  | Score | Exon    | Intron    |
|-------|------|-------|---------|-----------|
| 710   | 724  | 0.57  | ggctgca | Gtgagtca  |
| 1202  | 1216 | 0.80  | tgaattg | Gtaaattgt |
| 1302  | 1316 | 0.80  | tctaaag | Gtttgac   |
| 1392  | 1406 | 0.91  | ttgaatt | Gtaagtaa  |
| 1485  | 1499 | 0.70  | atataag | Gtagtgac  |
| 1558  | 1572 | 0.93  | gtttgag | Gttagaac  |

**Donor site predictions for Mut :**

| Start | End  | Score | Exon    | Intron   |
|-------|------|-------|---------|----------|
| 710   | 724  | 0.57  | ggctgca | Gtgagtca |
| 1302  | 1316 | 0.80  | tctaaag | Gtttgac  |
| 1392  | 1406 | 0.91  | ttgaatt | Gtaagtaa |
| 1485  | 1499 | 0.70  | atataag | Gtagtgac |
| 1558  | 1572 | 0.93  | gtttgag | Gttagaac |

[ NetGene2 v. 2.4]

Donor splice sites, direct strand

---

|    | pos  | 5'->3' | phase | strand | confidence | 5'  | exon | intron | 3'  |        |           |
|----|------|--------|-------|--------|------------|-----|------|--------|-----|--------|-----------|
| WT | 1209 |        | 0     | +      | 0.42       | CAC | GAA  | TTG^G  | TAA | TGTTIC |           |
|    | 1399 |        | 2     | +      | 0.32       | CC  | TTG  | AAT    | ^G  | TAA    | GTAAATA   |
|    | 1565 |        | 0     | +      | 0.00       | TT  | GGT  | TTG    | A   | ^G     | TTAGAACGG |

  

Donor splice sites, direct strand

---

|     | pos  | 5'->3' | phase | strand | confidence | 5' | exon | intron | 3' |     |           |
|-----|------|--------|-------|--------|------------|----|------|--------|----|-----|-----------|
| Mut | 1399 |        | 2     | +      | 0.32       | CC | TTG  | AAT    | ^G | TAA | GTAAATA   |
|     | 1565 |        | 0     | +      | 0.00       | TT | GGT  | TTG    | A  | ^G  | TTAGAACGG |

**Figure S5. *In silico* Prediction of the Splicing Abnormality Caused by c.969+1G>A**

The upper and lower panels show the splice sites predicted by NNSPLICE 0.9 ([http://www.fruitfly.org/seq\\_tools/splice.html](http://www.fruitfly.org/seq_tools/splice.html)) and NetGene2 v. 2.4 (<http://www.cbs.dtu.dk/services/NetGene2/>), respectively. The canonical donor site in the wild-type allele marked by red boxes (based on the two prediction programs) is abolished in the mutant allele.

**Figure S6**

| #CHROM | POS      | ID         | REF | ALT | SRNS-1<br>II-4 | SRNS-2<br>II-1 | SRNS-TK1<br>II-1 | SRNS-TWH1<br>II-1 | SRNS-12<br>II-3 |
|--------|----------|------------|-----|-----|----------------|----------------|------------------|-------------------|-----------------|
| 12     | 66838243 | rs10878422 | A   | G   | G              | G              | G                | G                 | G               |
| 12     | 67706466 | rs1060350  | G   | A   | G              | G              | G                | G                 | G               |
| 12     | 68045403 | rs10878641 | G   | A   | A              | A              | G                | G                 | A               |
| 12     | 68052178 | rs3741644  | G   | T   | T              | (T)            | T                | T                 | T               |
| 12     | 68372071 | rs7299287  | C   | A   | A              | (A)            | A                | A                 | (A)             |
| 12     | 68595719 | rs10748100 | T   | C   | T              | C              | T                | T                 | (T)             |
| 12     | 68595787 | rs10748101 | A   | G   | A              | G              | A                | A                 | (A)             |
| 12     | 68646521 | rs2227491  | T   | C   | T              | C              | T                | T                 | (T)             |
| 12     | 68688939 | rs7958232  | C   | T   | T              | (T)            | T                | T                 | (T)             |
| 12     | 68707576 | rs4575357  | G   | A   | A              | (A)            | A                | A                 | G               |
| 12     | 68708761 | rs2306393  | C   | T   | T              | (T)            | T                | T                 | (T)             |
| 12     | 68719216 | rs2870812  | G   | A   | A              | (A)            | A                | A                 | (A)             |
| 12     | 68720627 | rs962976   | G   | A   | A              | (A)            | A                | A                 | (A)             |
| 12     | 68721040 | rs962977   | A   | G   | G              | (G)            | G                | G                 | (G)             |
| 12     | 68724951 | rs3741808  | G   | T   | T              | (T)            | T                | T                 | (T)             |
| 12     | 68867496 | .          | T   | TA  | TA             | TA             | TA               | TA                | TA              |
| 12     | 68868056 | rs9325188  | A   | G   | G              | G              | G                | G                 | G               |
| 12     | 68868289 | rs2015278  | G   | A   | A              | A              | A                | A                 | A               |
| 12     | 68881347 | rs7307851  | C   | G   | G              | G              | G                | G                 | G               |
| 12     | 68881563 | .          | TC  | T   | T              | T              | T                | T                 | T               |
| 12     | 69129114 | c.2492A>C  | A   | C   | C              | C              | C                | C                 | C               |
| 12     | 69207162 | rs1470383  | G   | A   | A              | A              | A                | A                 | A               |
| 12     | 69208578 | rs1846402  | A   | C   | C              | C              | C                | C                 | C               |
| 12     | 69218038 | rs2291857  | T   | G   | G              | G              | G                | G                 | G               |
| 12     | 69250548 | rs3741598  | C   | T   | T              | T              | T                | T                 | T               |
| 12     | 69261044 | rs1144949  | C   | T   | T              | T              | T                | T                 | T               |
| 12     | 69279736 | rs2701085  | A   | G   | G              | G              | G                | G                 | G               |
| 12     | 69633379 | rs2305642  | A   | G   | G              | G              | G                | G                 | (G)             |
| 12     | 69645864 | rs490872   | A   | G   | G              | G              | G                | G                 | (G)             |
| 12     | 69646010 | rs607797   | T   | C   | C              | C              | C                | C                 | (C)             |
| 12     | 69652336 | .          | G   | GT  | GT             | GT             | GT               | GT                | (GT)            |
| 12     | 69653146 | rs2231700  | T   | C   | C              | C              | C                | C                 | (C)             |
| 12     | 69667075 | rs1463335  | T   | A   | A              | A              | A                | A                 | (A)             |
| 12     | 69678311 | .          | T   | C   | C              | C              | C                | C                 | C               |
| 12     | 69747177 | rs710794   | C   | T   | T              | T              | T                | T                 | T               |
| 12     | 69753595 | rs622656   | C   | T   | C              | T              | C                | T                 | C               |
| 12     | 69759551 | .          | AT  | A   | AT             | A              | AT               | A                 | AT              |
| 12     | 69967636 | rs512853   | C   | T   | T              | T              | T                | T                 | T               |
| 12     | 69979127 | rs17106752 | G   | A   | G              | A              | G                | G                 | (G)             |
| 12     | 69980028 | rs485288   | G   | A   | A              | A              | A                | A                 | A               |
| 12     | 69980141 | rs484319   | G   | C   | C              | C              | C                | C                 | C               |
| 12     | 69980434 | rs80262100 | C   | T   | C              | T              | C                | C                 | (C)             |
| 12     | 69981862 | rs530701   | G   | A   | A              | A              | A                | A                 | A               |
| 12     | 69987494 | rs710773   | G   | A   | A              | A              | A                | A                 | A               |
| 12     | 69991627 | rs710765   | C   | T   | T              | T              | T                | T                 | T               |
| 12     | 69991675 | rs35639    | T   | C   | T              | C              | T                | T                 | (T)             |
| 12     | 70070942 | rs710718   | A   | G   | G              | G              | G                | G                 | G               |
| 12     | 70078124 | rs710715   | G   | C   | C              | C              | C                | G                 | C               |
| 12     | 70078172 | rs710714   | C   | T   | T              | T              | T                | C                 | T               |
| 12     | 70088085 | .          | AGT | A   | AGT            | A              | AGT              | AGT               | AGT             |
| 12     | 70091432 | rs775429   | T   | C   | C              | C              | C                | C                 | C               |
| 12     | 70190408 | rs17120917 | A   | C   | C              | (C)            | A                | A                 | A               |
| 12     | 70273303 | rs1240286  | C   | G   | G              | G              | G                | G                 | G               |
| 12     | 70274160 | .          | G   | A   | A              | A              | A                | A                 | A               |

**Figure S6. A Common Haplotype That Harbors c.2492A>C (p.Asp831Ala) Was Found in the Five**

**SRNS Families**

The confirmed mutation-specific haplotype (412 kb in size) highlighted in orange is common to all the families. The yellow highlighted region together with orange highlighted region (1038 kb in size) could be

considered the common haplotype if the inferred SNPs within parentheses are included, as parental exome data were unavailable for SRNS-2 and SRNS-12.

**Figure S7**

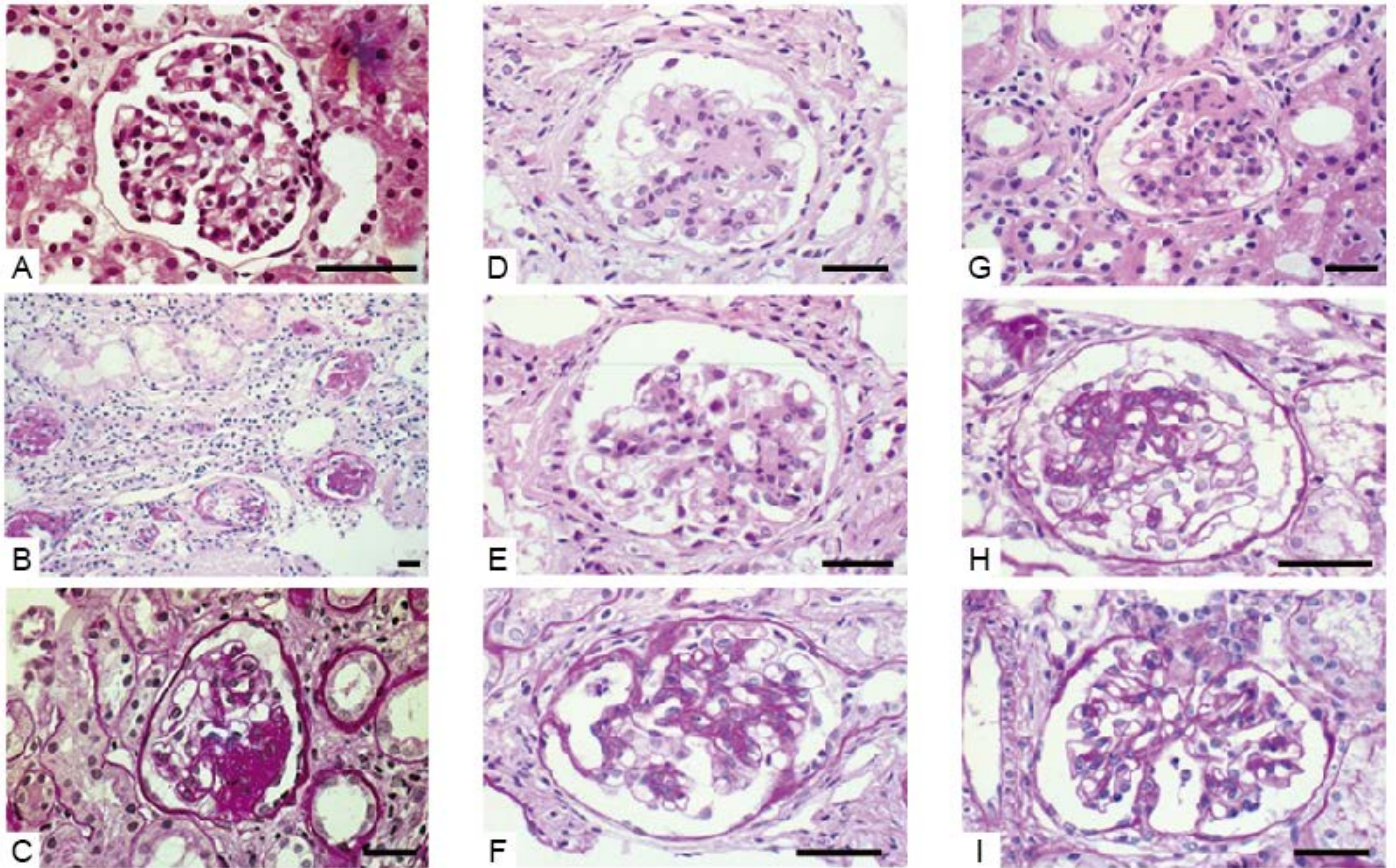

**Figure S7. Histopathological Images of Renal Biopsies from Affected Individuals in the SRNS-2**

**Family**

SRNS-2 II-1 underwent renal biopsies at ages 2 years (A) and at 4 years (B, C). The sclerotic changes became more prominent at 4 years of age. Biopsied samples of SRNS-2 II-3 (D, E, F) and SRNS-2 II-4 (G, H, I) stained with periodic Acid Schiff show focal segmental glomerulosclerosis [image magnifications:  $\times 100$  (b),  $\times 400$  (a, c-i)]. Scale bars: 40  $\mu\text{m}$ .

Figure S8

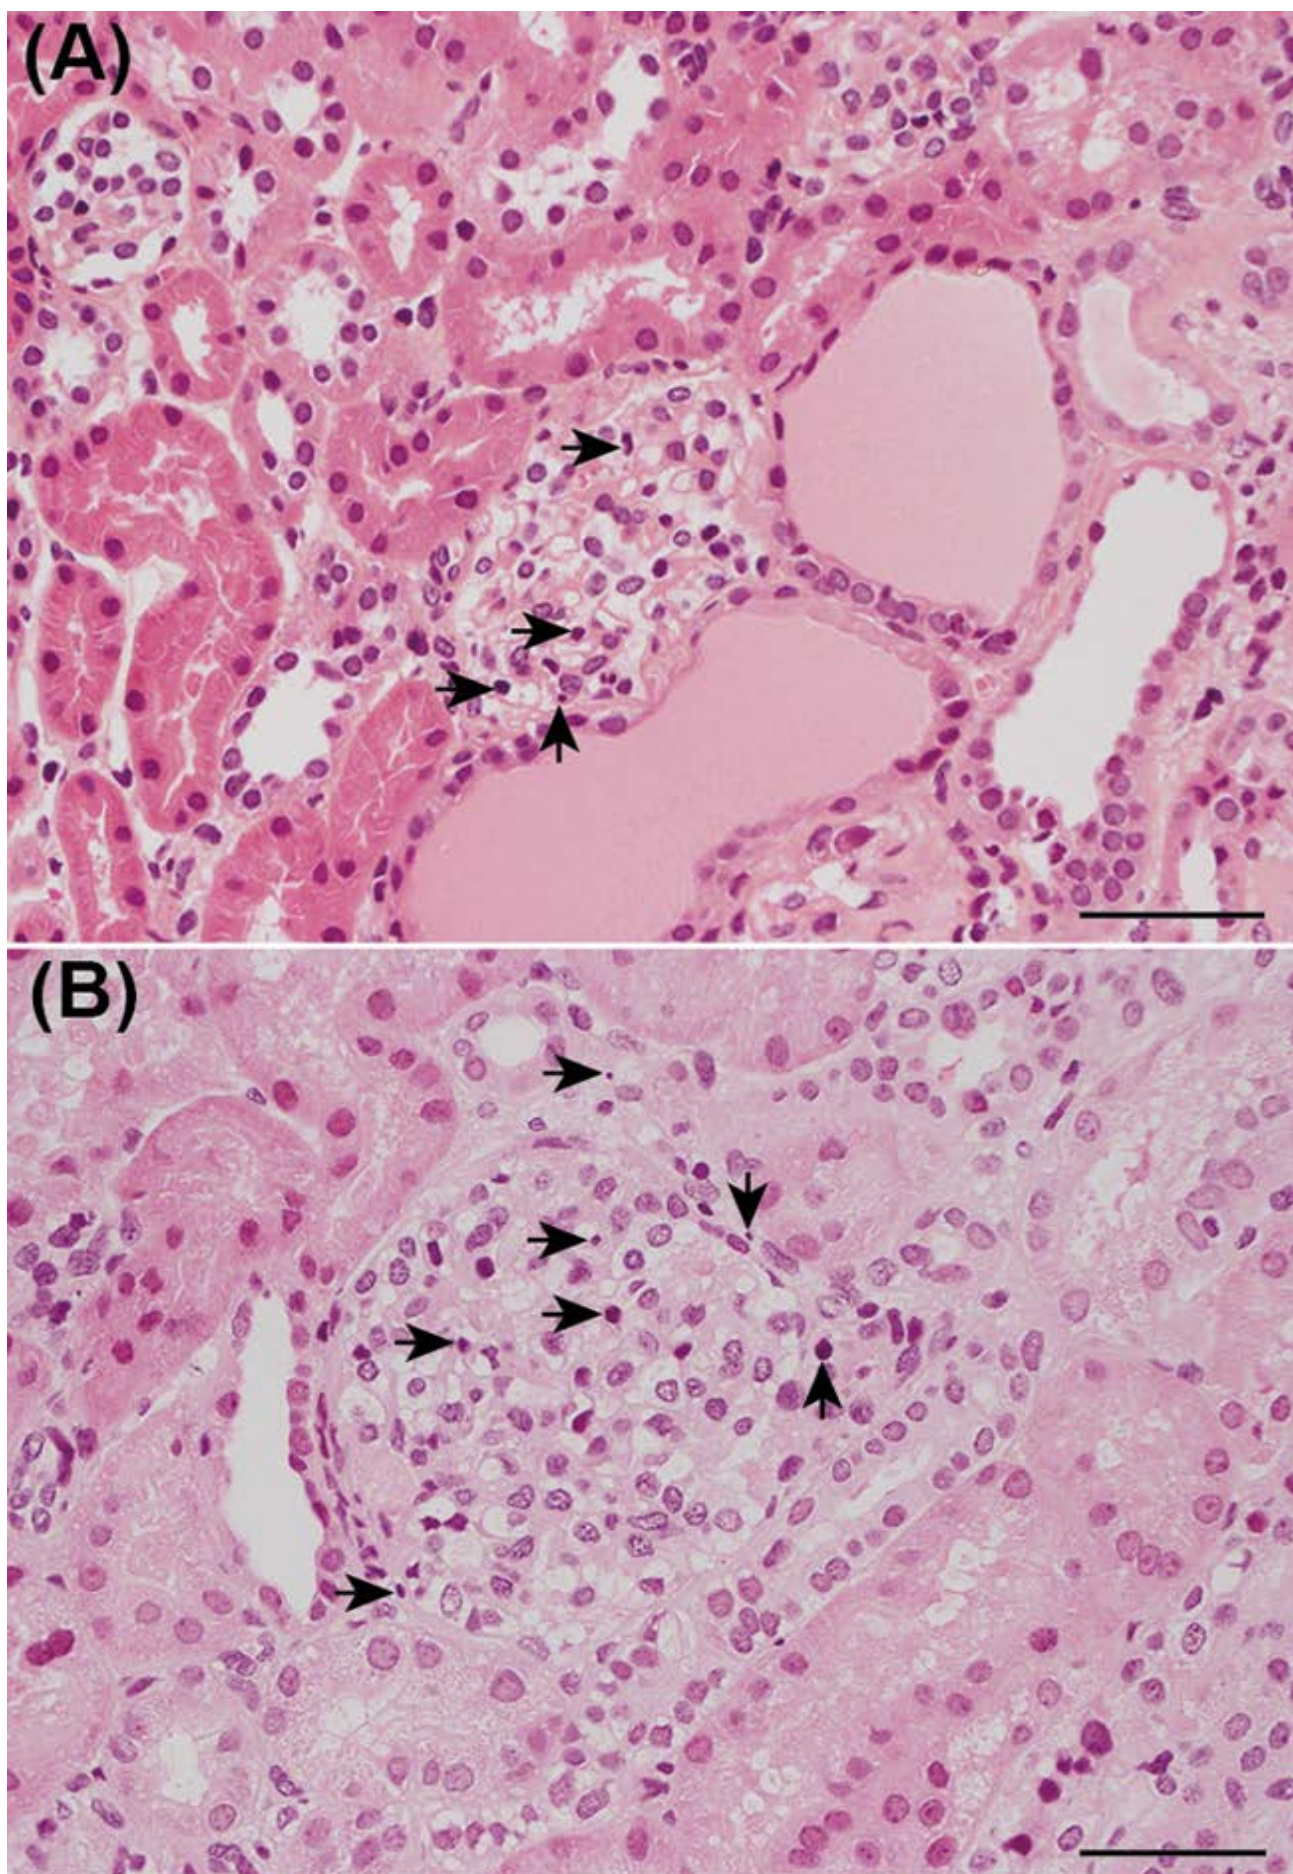

Figure S8. Hematoxylin and Eosin-Stained Kidney Tissues from Affected Individuals in the

## **SRNS-TWH1 Family**

These images are from SRNS-TWH1 II-1 (A) and SRNS-TWH1 II-2 (B). Cells that showed nuclear shrinkage and fragmentation were occasionally found in the glomeruli and renal tubules (arrows). Scale bars: 50  $\mu\text{m}$ .



**Figure S9**

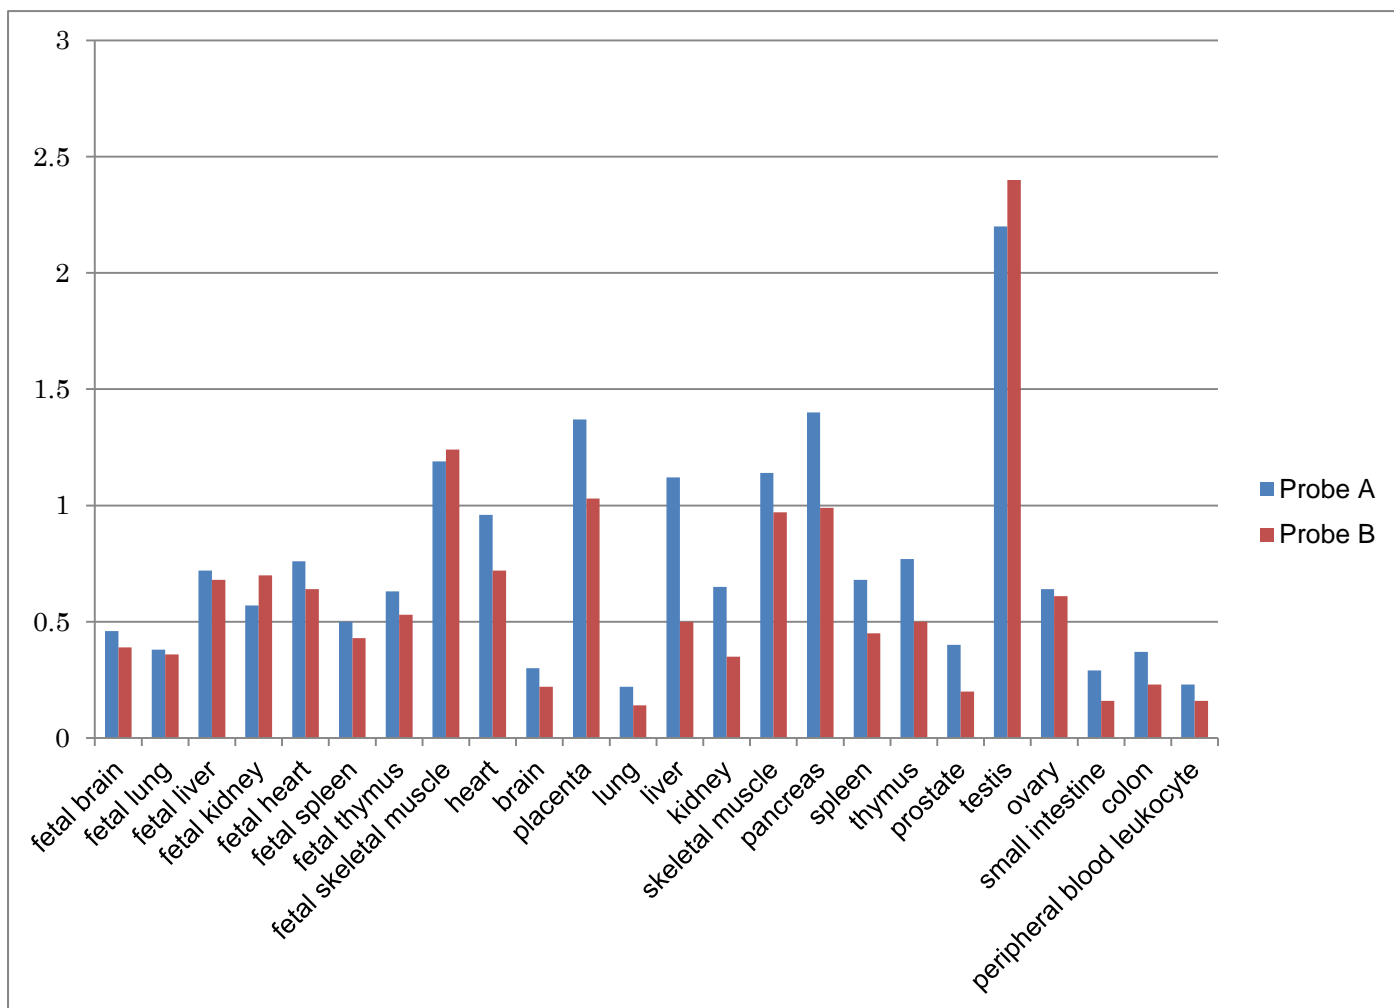

**Figure S9. Quantitative *NUP107* Expression Analysis in Fetal and Adult Tissues Using TaqMan Assays**

TaqMan Probes A (Hs00914854\_g1) and B (Hs00220703\_m1) show similar *NUP107* expression levels in various tissues. The Y-axis represents the relative expression levels normalized against beta-actin expression levels.

Figure S10

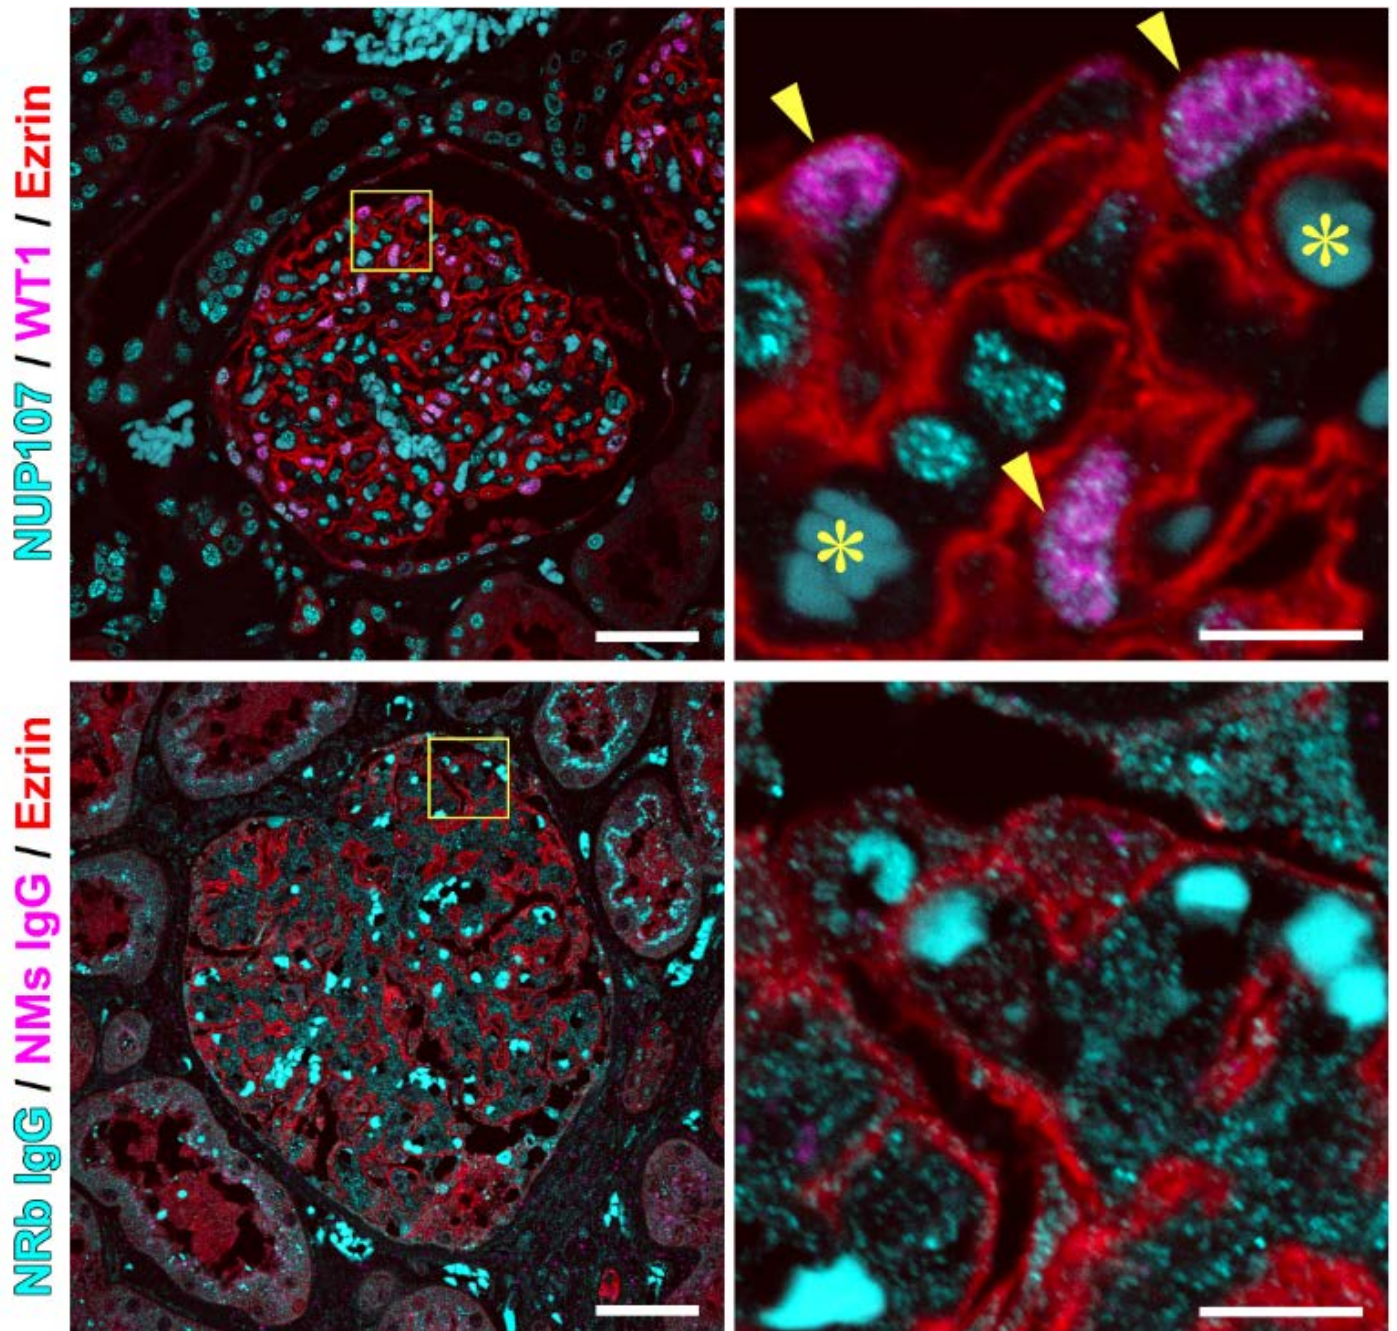

**Figure S10. Nuclear localization of NUP107 in podocytes**

Podocytes in human kidney sections were identified using antibodies against WT1 (magenta) and Ezrin (red) (upper panels). Boxed regions are enlarged (right) to show the speckle-like nuclear distribution of NUP107 in more detail. A single optical section shows the glomerular capillary tufts to be covered with podocytes; their nuclei on the glomeruli surfaces contain WT1 and NUP107 (arrow heads). Asterisks: autofluorescent

erythrocytes in the capillary lumen. Normal rabbit IgG (NRb IgG) and normal mouse IgG (NMs IgG) were used for negative controls (lower panels). Scale bars: 50  $\mu\text{m}$  (left); 10  $\mu\text{m}$  (right).

**Figure S11**

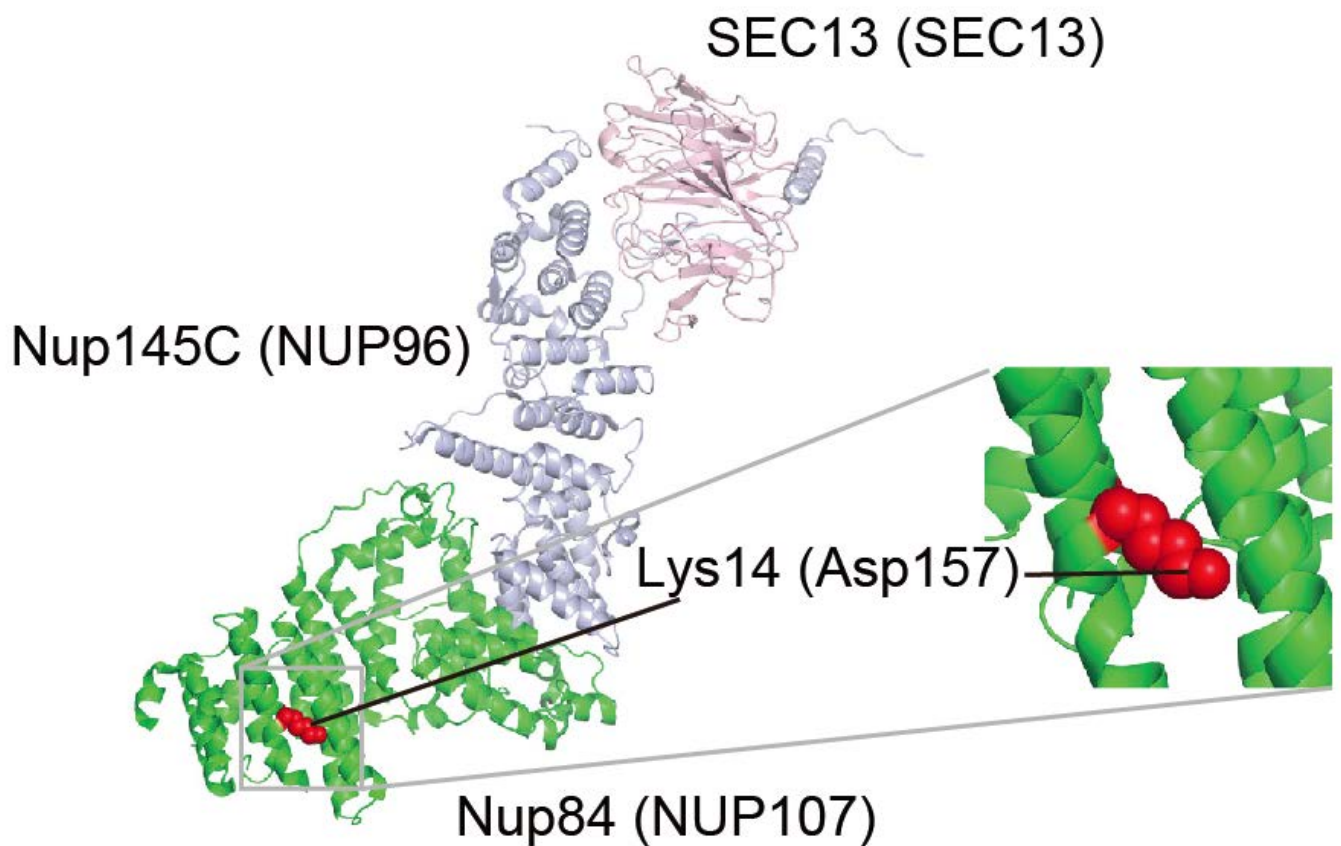

**Figure S11. Location of the p.Asp157 Missense Substitution**

Crystal structure of yeast Sec13 (amino acid residues 1–297, light pink)-Nup145C (731–1158, light blue)-Nup84 (1–460, green) complex (PDB code; 3IKO) is shown with a magnified view around the variant site in Nup84, which is the yeast homolog of human NUP107. Each component of the complex is annotated with the corresponding human homologs in parentheses. Lys 14 of yeast Nup84 (Asp 157 of human NUP107) is colored red; its side chain is shown as a van der Waals representation.

Figure S12

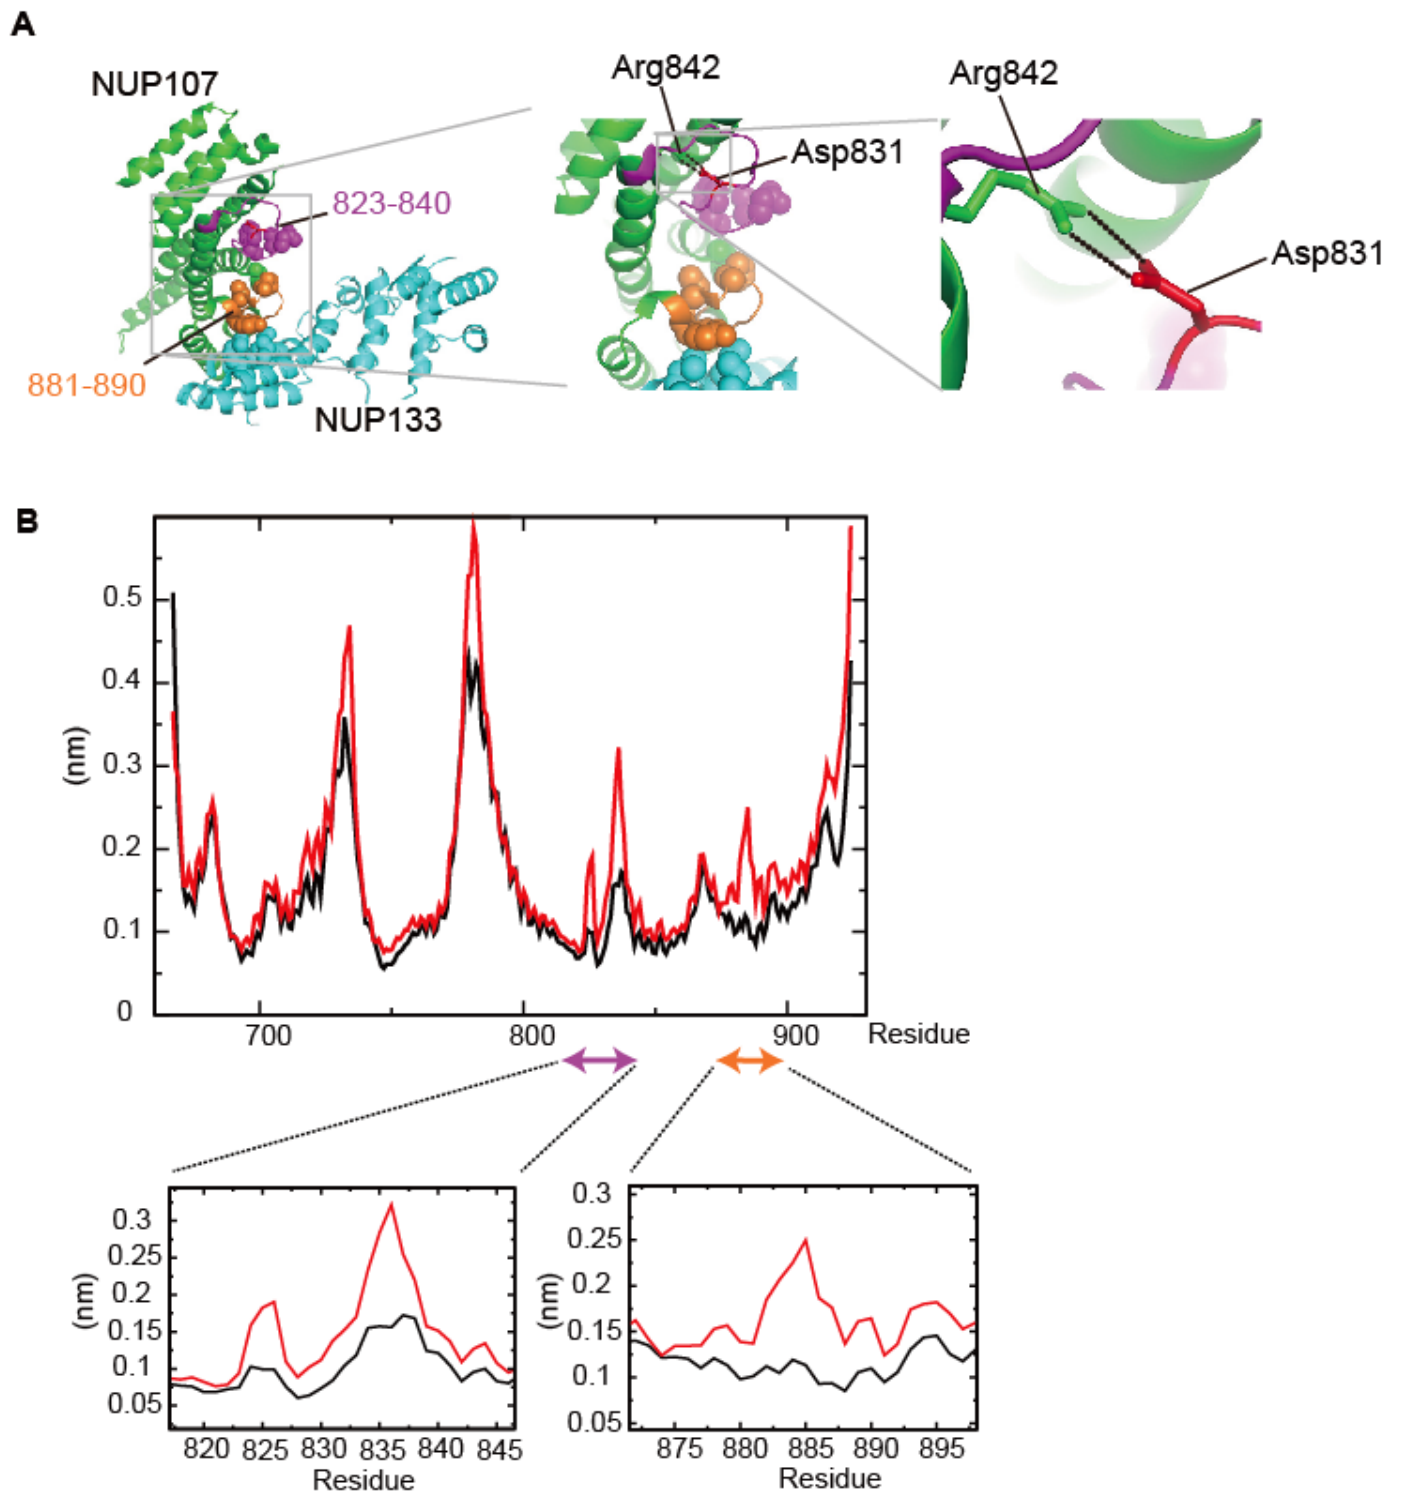

**Figure S12. Molecular Structure Effects Caused by Replacement of Residue Asp831 in NUP107**

(A) Crystal structure of the nucleoporin NUP107-NUP133 complex (PDB code 3CQC), which includes the human NUP107 fragment (containing an amino acid region at 658–925, in green except for the regions described below), and the human NUP133 fragment (containing the amino acid region 935–1156, in cyan),

which is shown with magnified views of the squared regions. A residue at the mutation site, Asp 831 (in red), and amino acid regions 823–840 (in magenta) and 881–890 (in orange), are predicted by the molecular dynamics simulation to cause a structural perturbation of the p.Asp831Ala mutation (see main text). Side chains of some hydrophobic residues that are involved in these two regions are shown in a van der Waals sphere representation; those of Asp 831 and Arg 842 are depicted as sticks. Black dotted lines represent hydrogen bonds. (B) Root mean squared fluctuation (RMSF) plots of NUP107 along the MD simulations. The RMSFs of the backbone atoms of the wild-type NUP107 fragment (amino acid residues 685–925; in black) and its Asp831Ala variant (red) are plotted. Graphic scales corresponding to amino acid regions 815–847 and 873–897 are magnified.

**Figure S13**

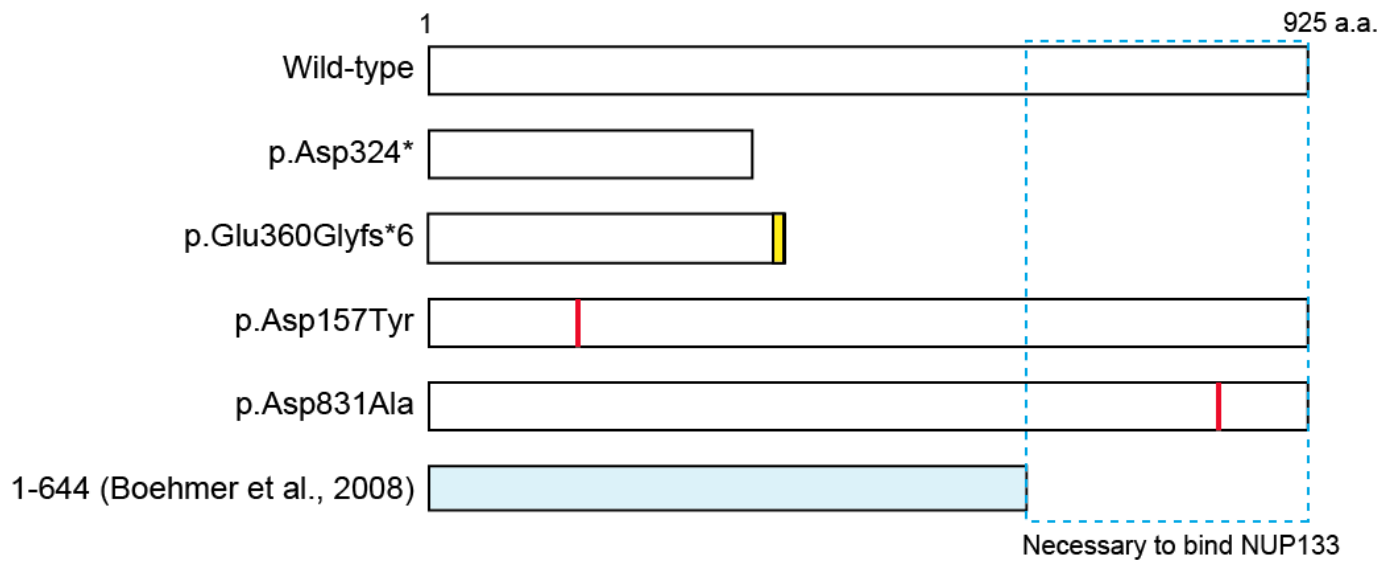

**Figure S13. Schematic of the NUP107 Constructs Illustrating the Mutation Positions**

Wild-type and four mutant *NUP107* constructs were subcloned into a mammalian expression vector. The shorter protein (light blue box, 1–644 amino acids) cannot bind to NUP133.<sup>2</sup> The blue dotted rectangular region is important for binding to NUP133.<sup>2</sup> The yellow box and red vertical bars indicate the positions of added abnormal amino acids by the frameshift mutation and the positions of each point mutation, respectively.

Figure S14

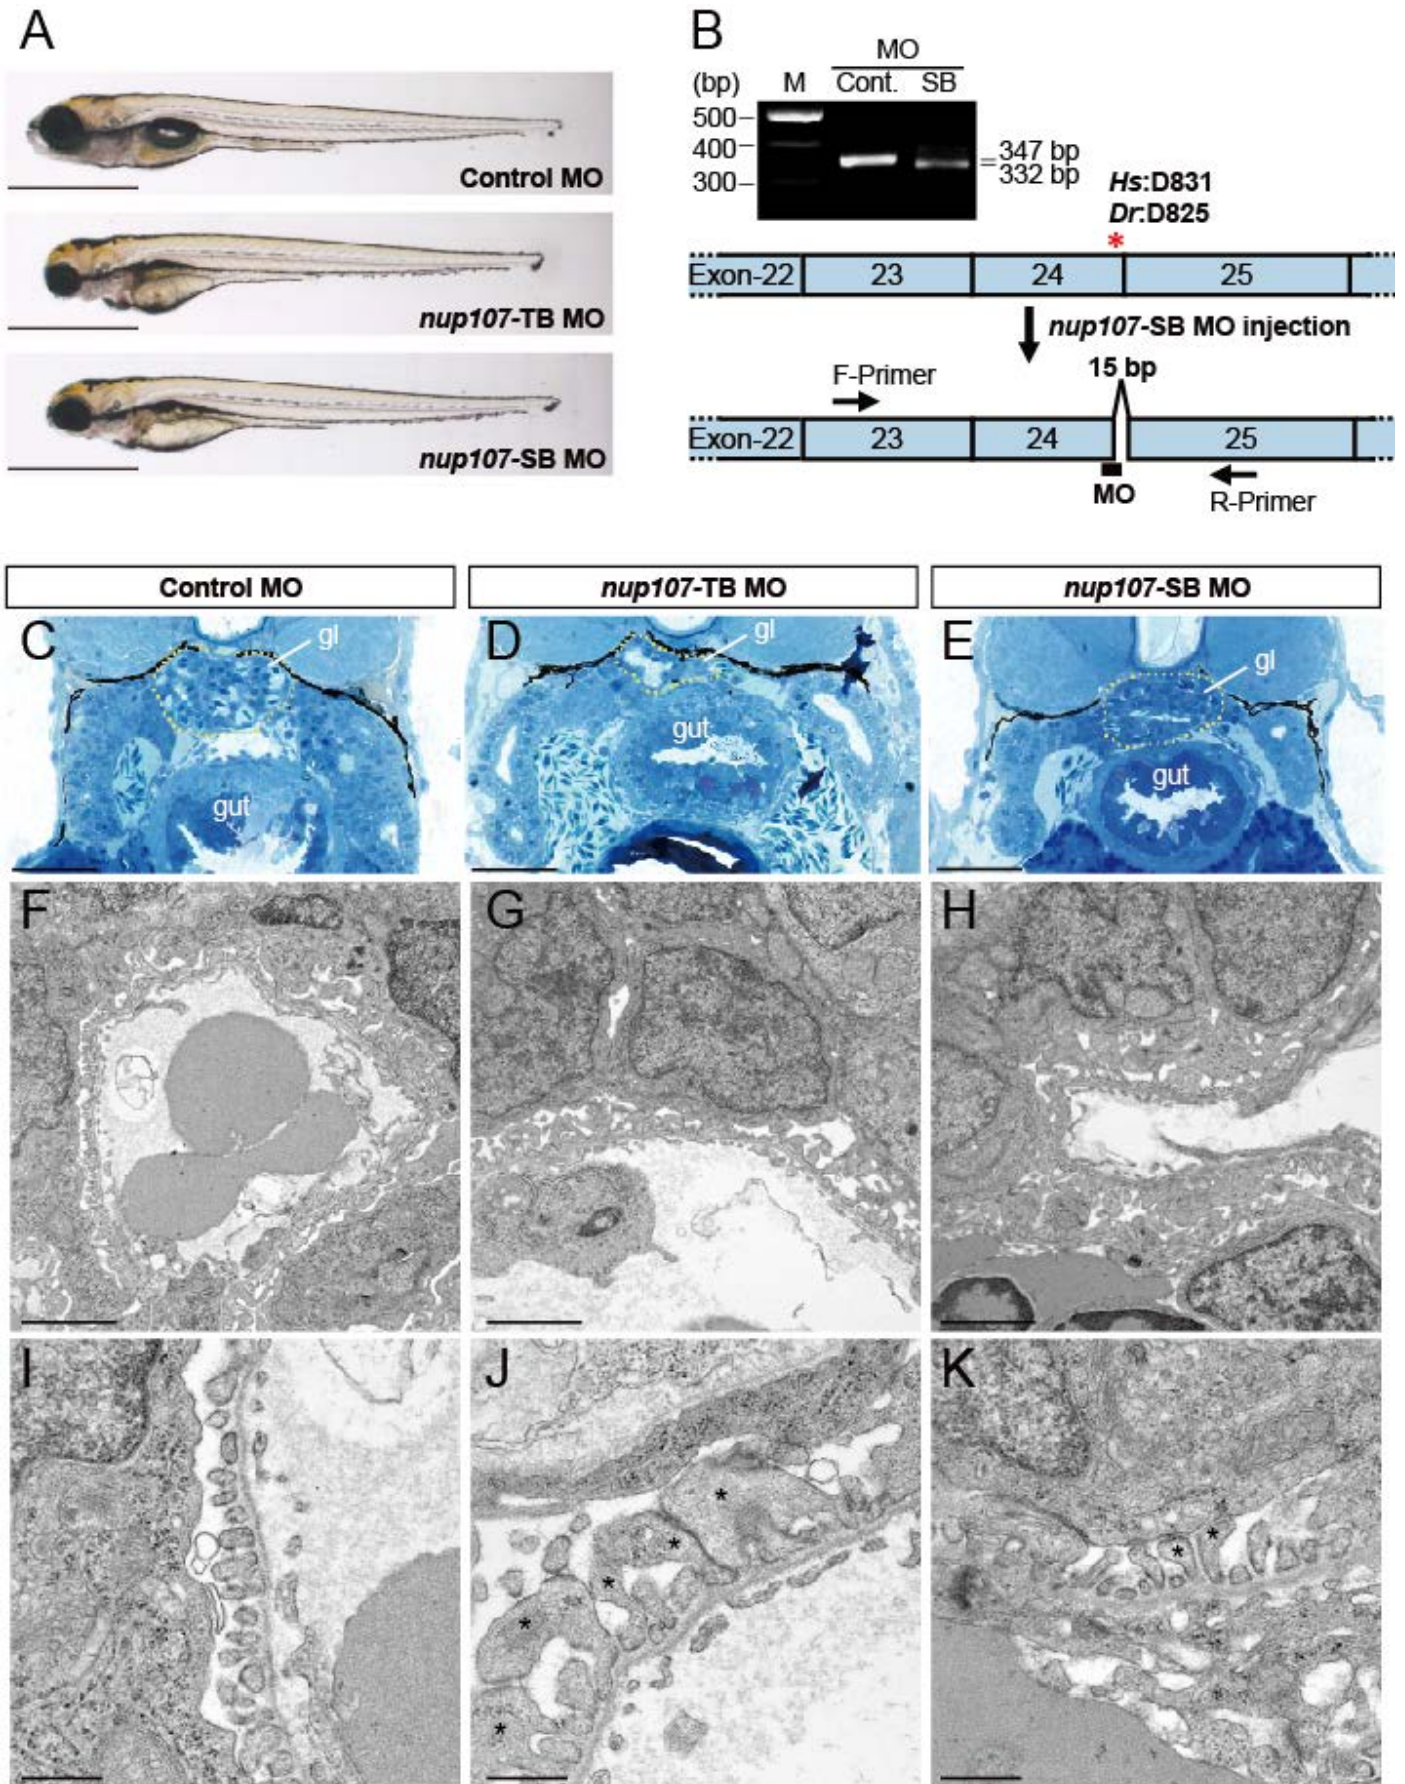

Figure S14. Zebrafish *nup107* Morphant Phenotype Recapitulates the Features of Human SRNS with



## ***NUP107* Mutations**

(A) Gross morphology of normal and affected larvae injected with control morpholino oligonucleotides (MO), *nup107* translation-blocking MO (*nup107*-TB MO) and *nup107* splice-blocking MO (*nup107*-SB MO). Lateral views of MO-injected larvae at 5 days post-fertilization (dpf) are shown. Scale bars: 1 mm. (B) RT-PCR sequencing of the aberrant splice products show a 15-bp in-frame deletion (WT; 347 bp, *nup107*-SB MO; 332 bp) in the coding exon included a five-amino-acid sequence conserved between humans and zebrafish. The conserved position of the substituted residue in affected individuals (*Homo sapiens*; p.Asp831, *Danio rerio*; p.Asp825) is shown as a red asterisk. The corresponding positions of the F-Primer, R-Primer, and MO are schematically presented. (C-E) Transverse sections of the glomerulus (gl) in the control MO-, *nup107*-TB MO- and *nup107*-SB MO-injected larvae at 5.5 dpf. Scale bars: 0.05 mm. (C) The control MO-injected larvae had a complete glomerular capillary and mesangium. (D) Morphology of the glomerulus and mesangium was markedly disrupted in the *nup107*-TB morphants. (E) The *nup107*-SB morphants showed hypoplastic glomerulus. (F-H) Electron micrographs of the MO-injected larvae at 5.5 dpf. Scale bars: 2  $\mu$ m. (I-K) electron micrographs at higher magnification. Abnormal shape of the foot processes (asterisks), collapse of the capillary lumen and thickened basement membrane are seen in both *nup107*-TB and *nup107*-SB morphants (G, H, J, K), whereas the control morphant had a normal appearance (F, I). Scale bars: 500 nm.

**Figure S15**

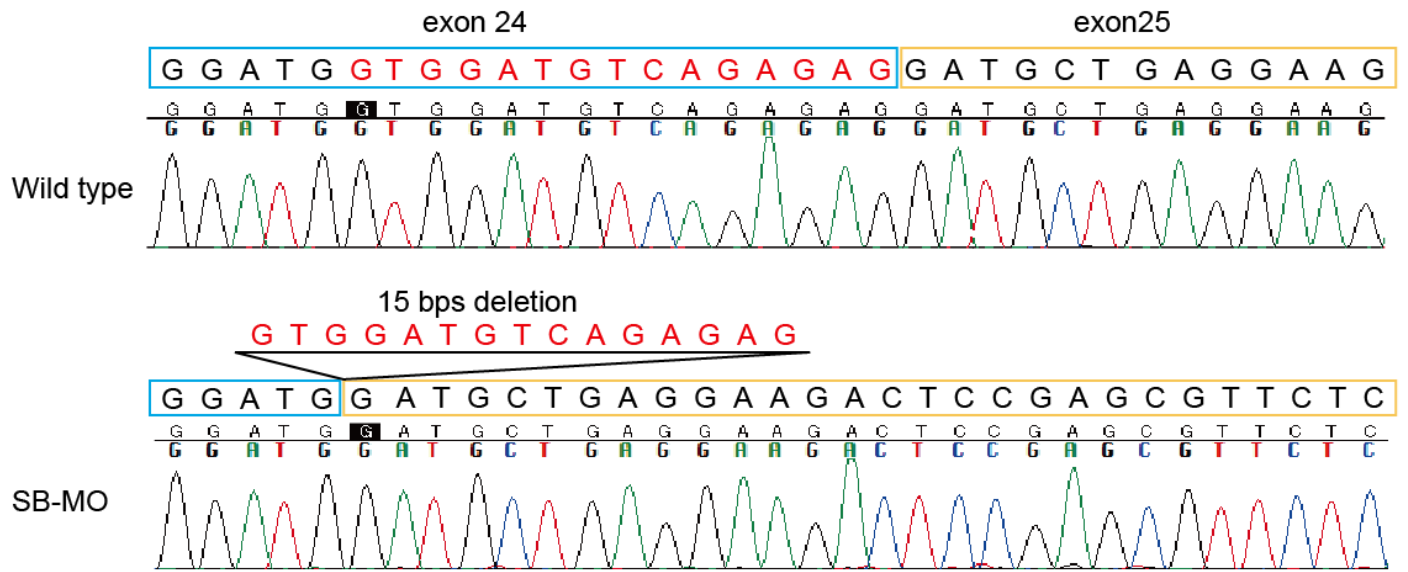

**Figure S15. Chromatogram of cDNA sequences in wild-type and SB-MO zebrafish**

cDNA sequence of SB-MO shows a 15-bp deletion (red characters) which resulted in an in-frame deletion.

Parts of exons 24 and 25 are indicated by light blue and orange boxes, respectively.

Figure S16

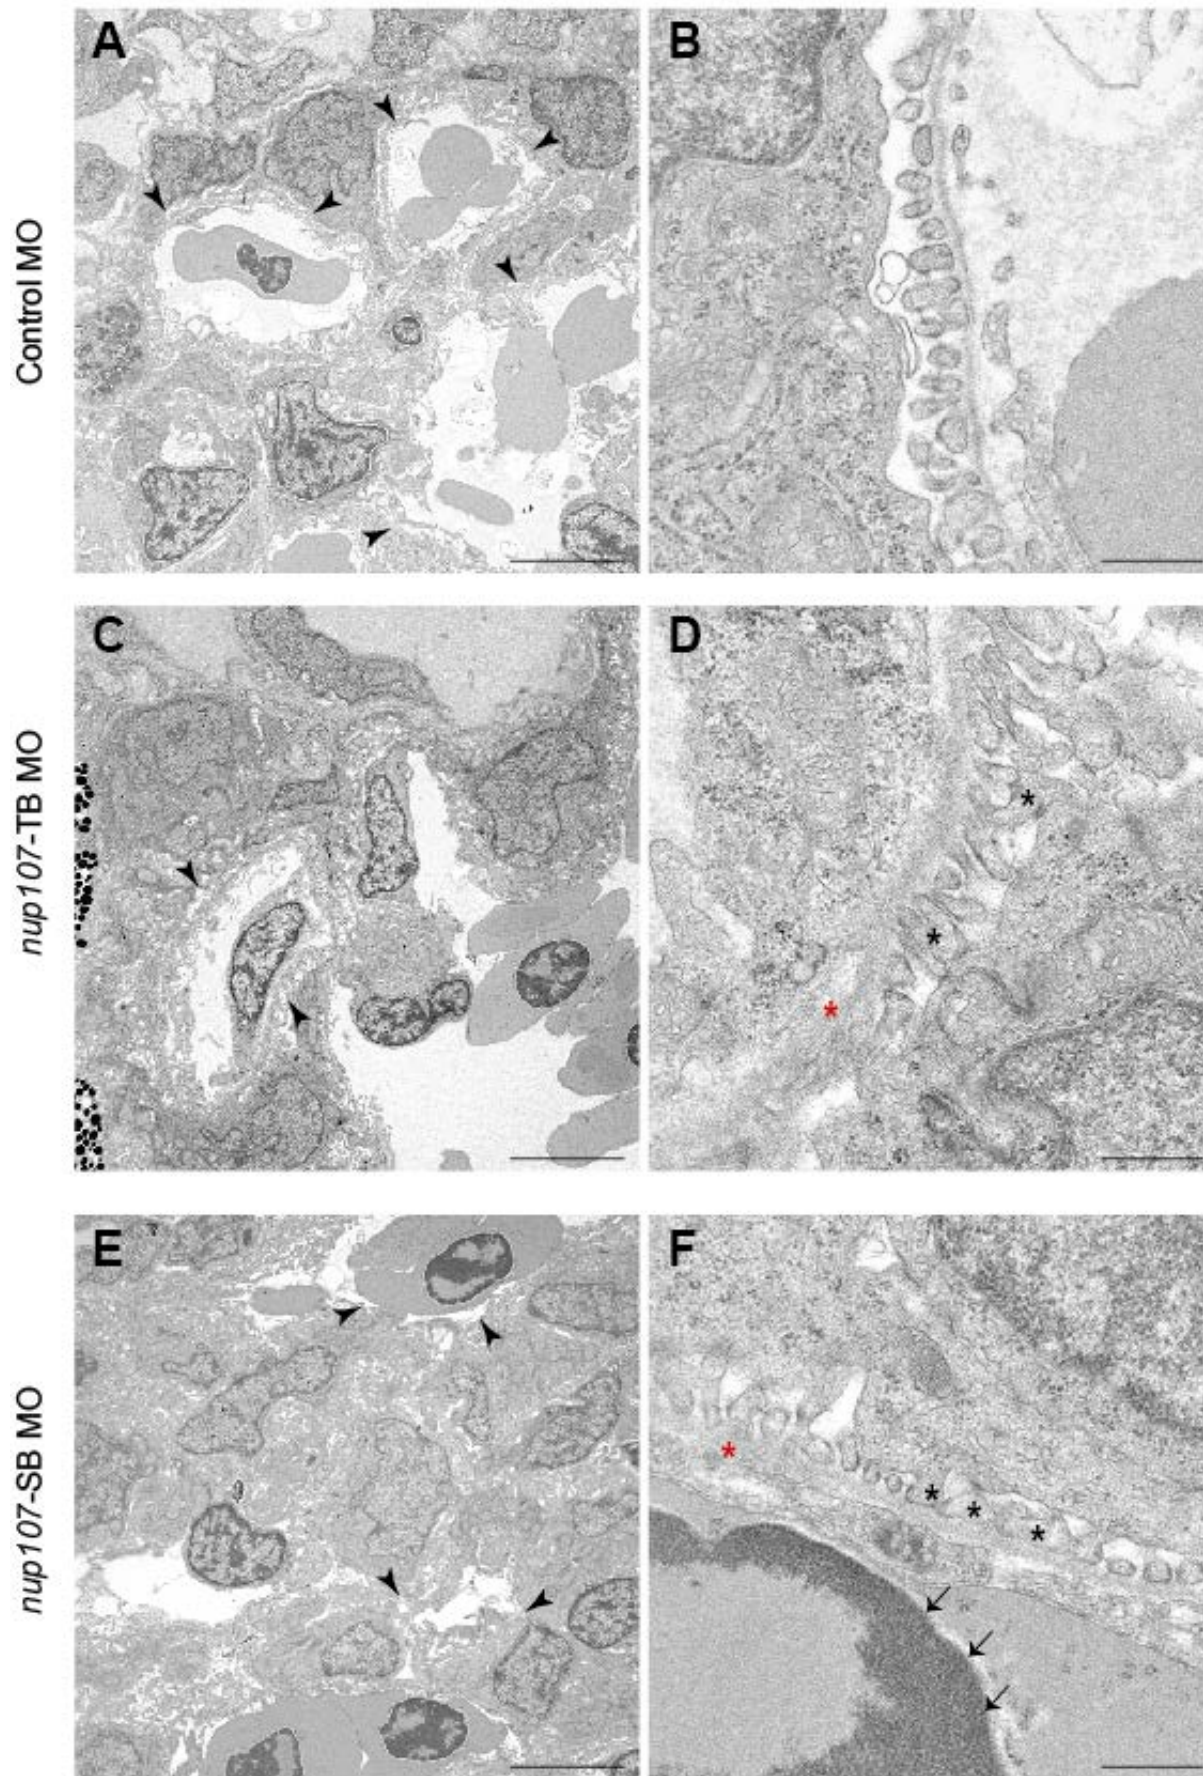

Figure S16. Electron Microscopy of Kidney Samples from Zebrafish *nup107*-Morphants

These electron micrographs depict tissue from the control morphant (A, B), the translation-blocking morphant (*nup107*-TB MO) (C, D), and the *nup107* splice-blocking morphant (*nup107*-SB MO) (E, F). The filtration structures (arrowheads) can be clearly observed in the control morphant (A) but are relatively fuzzy and disorganized in both of the other morphants (C, E). Abnormal foot processes (black asterisks), thickened or blurry basement membranes (red asterisks), and protein droplets (black arrows) could reflect cellular damage in the filtration apparatus. Scale bars: 5  $\mu\text{m}$  (A, C, E); 500 nm (B, D, F).

Figure S17

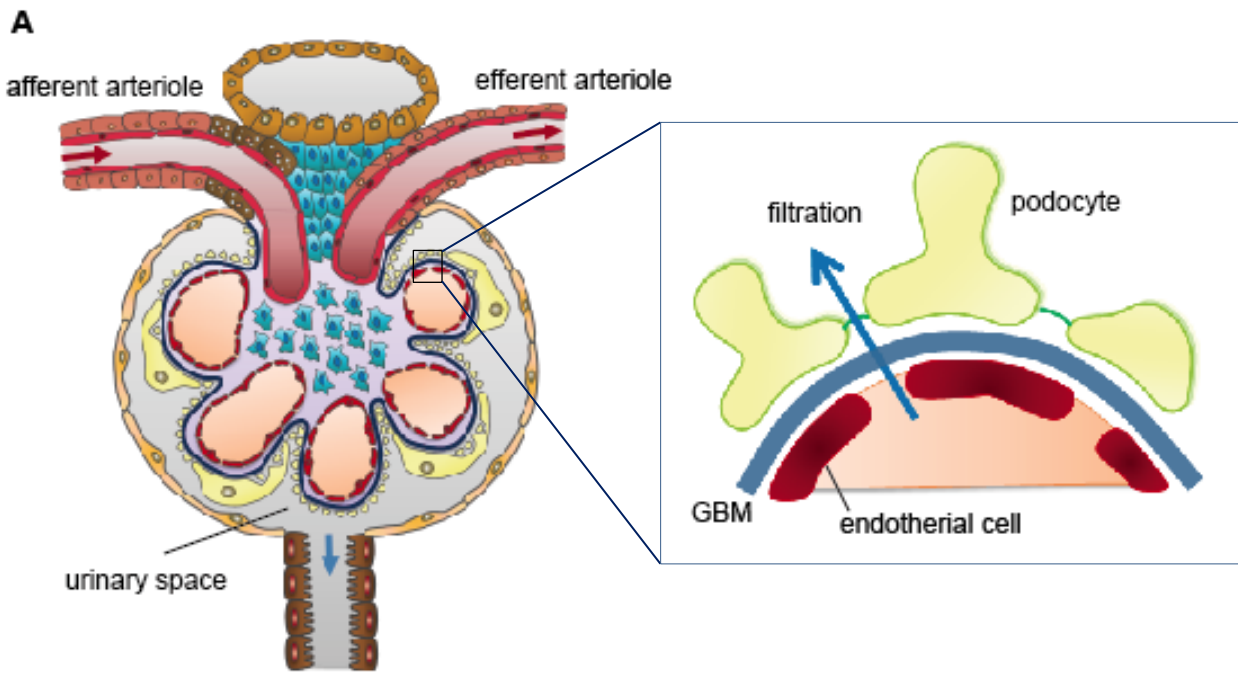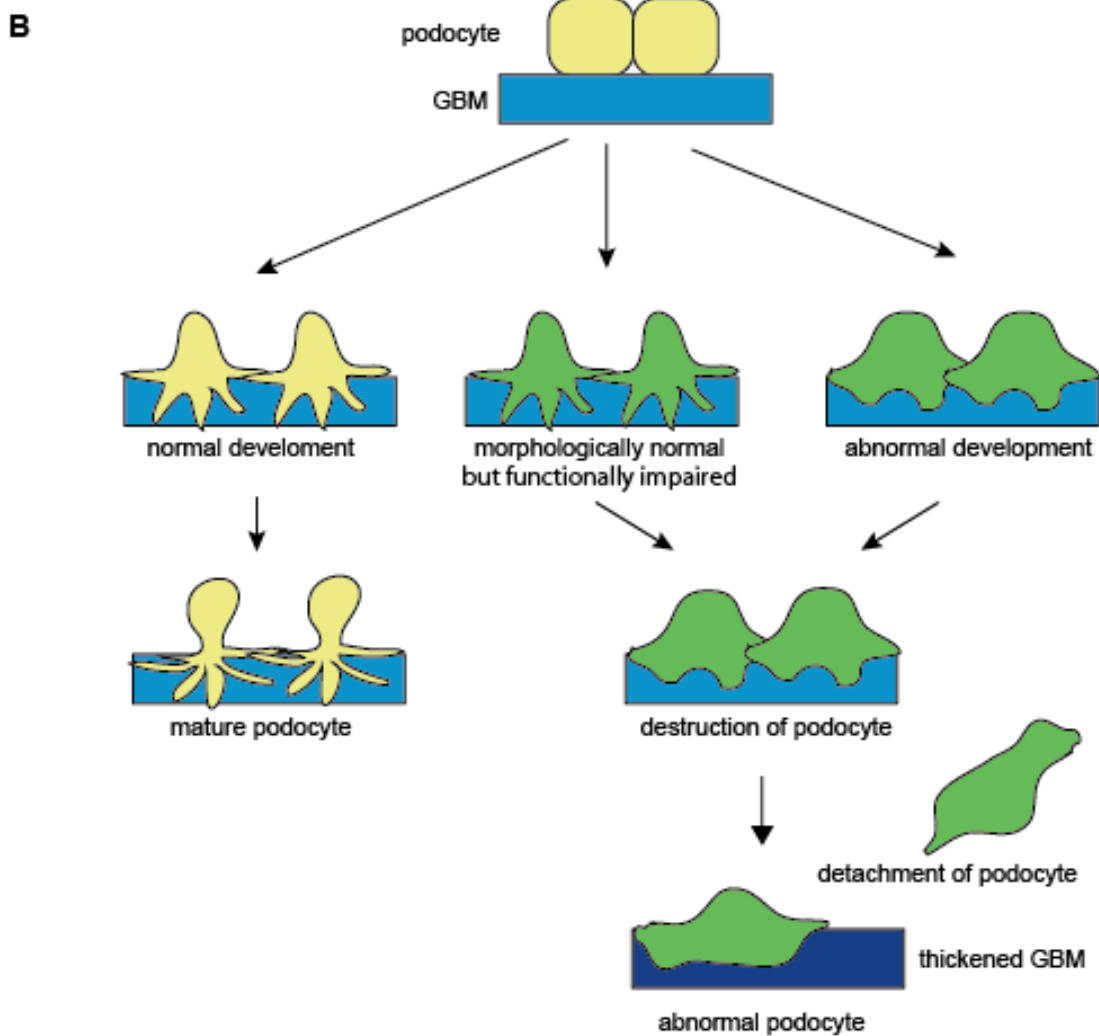

Figure S17. Podocyte Injury Model Based on *NUP107* Mutations

(A) Schematic presentation of the glomerulus. Podocytes (yellow) cover the outer layer of the capillary wall by projecting enormous foot processes with the glomerular basement membrane (dark blue). The inner surface of the capillary lumen is lined with endothelial cells (dark red). The capillary tuft is supported by mesangial cells (light blue) and surrounding matrix (light purple). The enlarged window shows the renal filtration structure. The foot processes of neighboring podocytes (yellow) connect with each other in an interdigitating fashion, leaving 20–50 nm intercellular filtration slits that are bridged by a specialized cell–cell junction known as the slit diaphragm (green line). The slit diaphragm serves as a filtration barrier, which prevents leakage of circulating proteins into the urine. Properly functioning podocytes are crucial for maintaining the integrity and selectivity of the barrier. (B) Podocytes first develop as attached columnar epithelial cells. Attachments between the podocyte cell bodies begin to separate except for the basal part that later forms foot processes through maturation.<sup>3</sup> Normal podocytes (yellow) interact with each other by their foot processes or with the slit membrane, and function as a filter. However, the abnormally developed podocytes (green) possess abnormally fragile foot processes (either by structure or function). As blood pressure increases after birth, the podocytes cannot withstand the post-natal capillary pressure and may become damaged. GBM: glomerular basement membrane.

**Table S1. Summary of WES performance (read depth)**

| Family ID | Individual ID | Identification      | Total (bps) | Mean depth | % $\geq 5\times$ | % $\geq 10\times$ | % $\geq 20\times$ |
|-----------|---------------|---------------------|-------------|------------|------------------|-------------------|-------------------|
| SRNS-1    | I-1           | Father              | 2692208251  | 80.43      | 97.1             | 95.8              | 91.4              |
| SRNS-1    | I-2           | Mother              | 2155302585  | 64.39      | 96.8             | 95                | 88.9              |
| SRNS-1    | II-4          | Affected individual | 2976332475  | 88.92      | 97.2             | 96.1              | 92.5              |
| SRNS-2    | I-2           | Mother              | 1963459760  | 58.66      | 96.7             | 94.6              | 87.3              |
| SRNS-2    | II-1          | Affected individual | 2941457991  | 87.88      | 97.1             | 95.9              | 92.3              |
| SRNS-TK1  | I-1           | Father              | 2799991123  | 83.65      | 97.1             | 95.8              | 91.8              |
| SRNS-TK1  | I-2           | Mother              | 2322428088  | 69.38      | 96.9             | 95.3              | 89.9              |
| SRNS-TK1  | II-1          | Affected individual | 3081605879  | 92.06      | 97.2             | 96.2              | 92.9              |
| SRNS-TWH1 | I-1           | Father              | 2506420047  | 74.88      | 96.9             | 95.4              | 90.4              |
| SRNS-TWH1 | I-2           | Mother              | 2930587186  | 87.55      | 97               | 95.8              | 92.2              |
| SRNS-TWH1 | II-1          | Affected individual | 2698525857  | 80.62      | 97               | 95.7              | 91.6              |
| SRNS-12   | II-3          | Affected individual | 3210918988  | 95.93      | 96.9             | 95.6              | 92                |

**Table S2. Priority scheme of homozygous variants in SRNS with *NUP107* mutations**

|                                                | SRNS-1 | SRNS-2 | SRNS-TK1 | SRNS-TWH1 | SRNS-12 |
|------------------------------------------------|--------|--------|----------|-----------|---------|
| Homozygous in affected person as autosome      | 1139   | 1111   | 1136     | 1103      | 1120    |
| Non-homozygous in father                       | 153    | NA     | 144      | 128       | NA      |
| Non-homozygous in mother                       | 72     | 118    | 75       | 73        | NA      |
| Frequency of $\leq 0.005$ in ExAC              | 19     | 19     | 19       | 19        | 75      |
| Frequency of $\leq 0.005$ in ESP6500           | 18     | 19     | 18       | 18        | 68      |
| Frequency of $\leq 0.005$ in HGVD              | 9      | 8      | 9        | 5         | 47      |
| Frequency of $\leq 0.005$ in in-house database | 2      | 1      | 0        | 0         | 0       |
| Non synonymous                                 | 1*     | 0      | 0        | 0         | 0       |

\*The candidate homozygous mutation was listed in Table S4.



**Table S3. Priority scheme of compound heterozygous variants in SRNS with *NUP107* mutations**

|                                                      | SRNS-1 | SRNS-2 | SRNS-TK1 | SRNS-TWH1 | SRNS-12 |
|------------------------------------------------------|--------|--------|----------|-----------|---------|
| Heterozygous variants in affected person as autosome | 2343   | 2146   | 2047     | 2089      | 1903    |
| Non-homozygous in father                             | 2255   | NA     | 1964     | 1969      | NA      |
| Non-homozygous in mother                             | 2144   | 2059   | 1861     | 1890      | NA      |
| Frequency of $\leq 0.005$ in ExAC                    | 1250   | 1164   | 1040     | 1133      | 1135    |
| Frequency of $\leq 0.005$ in ESP6500                 | 1242   | 1156   | 1032     | 1124      | 1126    |
| Frequency of $\leq 0.005$ in HGVD                    | 680    | 689    | 511      | 561       | 632     |
| Frequency of $\leq 0.005$ in In-house database       | 412    | 483    | 337      | 374       | 415     |
| Non synonymous                                       | 285    | 350    | 229      | 237       | 288     |
| Two or more variants in one gene                     | 22     | 32*    | 24       | 20        | 18*     |
| Compound heterozygous variant (gene)                 | 8 (4)* | NA     | 6 (3)*   | 10 (4) *  | NA      |

\*The candidates for compound heterozygous variants are listed in Table S5. NA: not analyzed by WES.

**Table S6. Mutant Genes Detected in SRNS/FSGS**

| Gene name       | Accession number | MIM     | Protein category                               |
|-----------------|------------------|---------|------------------------------------------------|
| <i>ACTN4</i>    | NM_004924.4      | *604638 | Actin cytoskeleton component                   |
| <i>ADCK4</i>    | NM_024876.3      | *615567 | Related to CoQ10 synthesis                     |
| <i>ANLN</i>     | NM_018685.2      | *616027 | Actin binding protein                          |
| <i>APOL1</i>    | NM_003661.3      | *603743 | Secreted high density lipoprotein              |
| <i>ARHGAP24</i> | NM_001025616.2   | *610586 | RHO GTPase-activating protein                  |
| <i>ARHGDIA</i>  | NM_001185077.1   | *601925 | RHO GTPases                                    |
| <i>CAPN12</i>   | NM_144691.3      | *608839 | Cytosolic calcium-activated cysteine proteases |
| <i>CD2AP</i>    | NM_012120.2      | *604241 | Slit-Diaphragm protein complex                 |
| <i>CFH</i>      | NM_000186.3      | *134370 | Complement factor H                            |
| <i>COL4A3</i>   | NM_000091.4      | *120070 | Collagen                                       |
| <i>COQ2</i>     | NM_015697.7      | *609825 | Mitochondrial protein                          |
| <i>INF2</i>     | NM_022489.3      | *610982 | Filament network                               |
| <i>LAMA5</i>    | NM_005560.3      | *601033 | Laminin                                        |
| <i>LAMB2</i>    | NM_002292.3      | *150325 | Glomerular basement membrane                   |
| <i>LMNA</i>     | NM_170707.3      | *150330 | Lamin                                          |
| <i>LMX1B</i>    | NM_002316.3      | *602575 | Nuclear protein                                |
| <i>MYH9</i>     | NM_002473.4      | *160775 | Actin cytoskeleton component                   |
| <i>MYO1E</i>    | NM_004998.3      | *601479 | Myosin                                         |
| <i>NPHS1</i>    | NM_004646.3      | *602716 | Slit-Diaphragm protein complex                 |
| <i>NPHS2</i>    | NM_014625.2      | *604766 | Slit-Diaphragm protein complex                 |
| <i>NXF5</i>     | NM_032946.2      | *300319 | Nuclear RNA export factor 5                    |
| <i>PAX2</i>     | NM_003987.3      | *167409 | Transcription factor                           |
| <i>PLCE1</i>    | NM_016341.3      | *608414 | Slit-Diaphragm protein complex                 |
| <i>PTPRO</i>    | NM_030667.2      | *600579 | Tyrosine phosphatase                           |
| <i>SMARCAL1</i> | NM_014140.3      | *606622 | Nuclear protein                                |
| <i>TRPC6</i>    | NM_004621.5      | *603652 | Slit-Diaphragm protein complex                 |
| <i>WT1</i>      | NM_024426.4      | *607102 | Nuclear protein                                |

## Supplemental References

1. Kitamura, A., Tsukaguchi, H., Iijima, K., Araki, J., Hattori, M., Ikeda, M., Honda, M., Nozu, K., Nakazato, H., Yoshikawa, N., et al. (2006). Genetics and clinical features of 15 Asian families with steroid-resistant nephrotic syndrome. *Nephrol Dial Transplant* 21, 3133-3138.
2. Boehmer, T., Jeudy, S., Berke, I.C., Schwartz, T.U. (2008). Structural and functional studies of Nup107/Nup133 interaction and its implications for the architecture of the nuclear pore complex. *Mol Cell* 30, 721-731.
3. Quaggin, S.E., Kreidberg, J.A. (2008). Development of the renal glomerulus: good neighbors and good fences. *Development* 135, 609-620.
